# Supplementary material for: Electrical synapse molecular diversity revealed by proximity-based proteomic discovery
Source: PubMed Central journal article supplement — bioRxiv. 2024 Nov 22:2024.11.22.624763. Preprint. [Version 1] doi: 10.1101/2024.11.22.624763 (PMC11601576; doi:10.1101/2024.11.22.624763), 2024-11-22

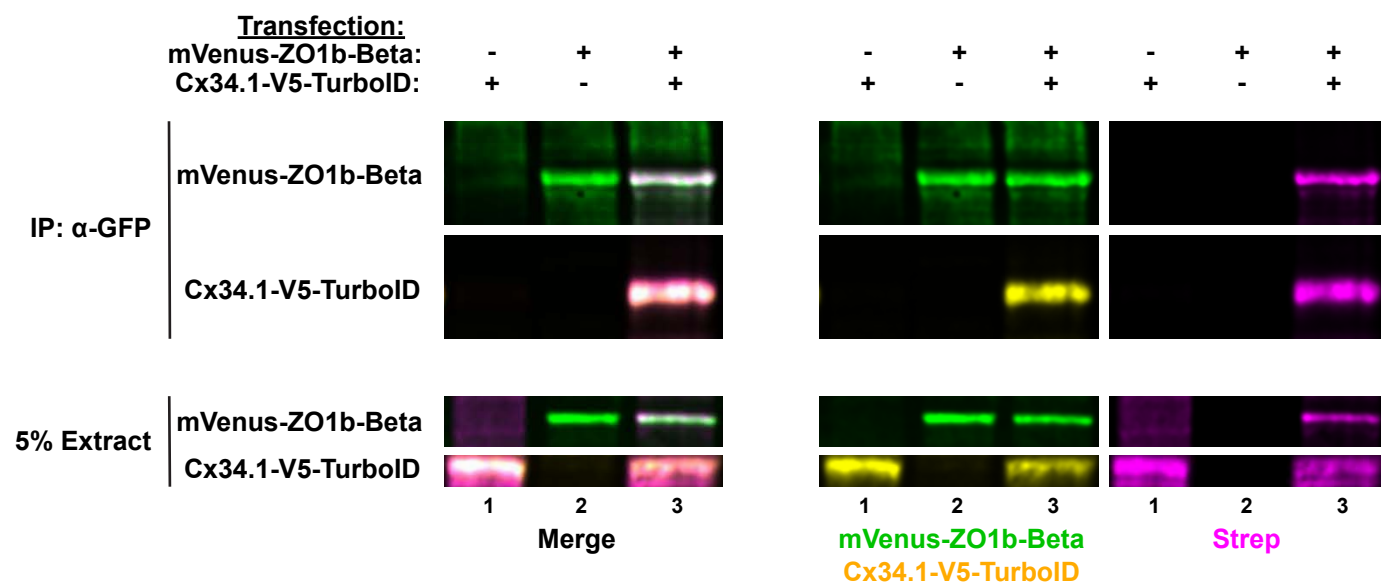

A

### *gjd1a/cx34.1* locus (chr 5)

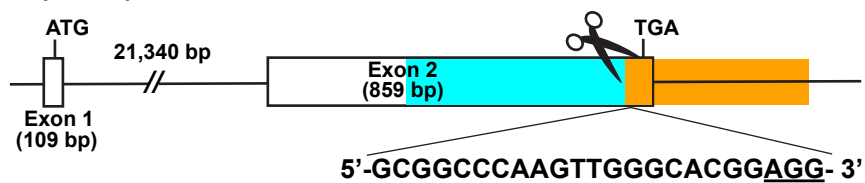

### dsDNA repair template

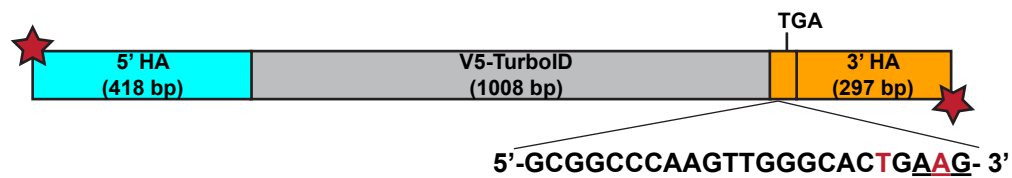

### Precise genome modification

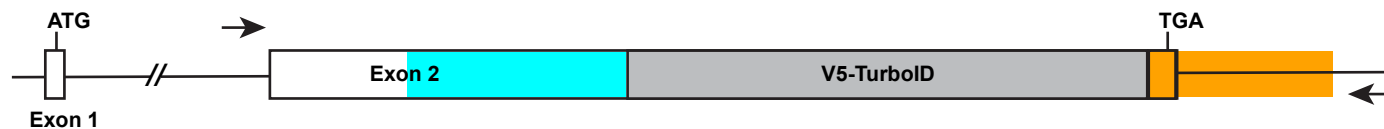

B

|               |     |                                                          |     |
|---------------|-----|----------------------------------------------------------|-----|
| wt tail       | 256 | KIKTAIRGVQARRKSICEIRKDD-----VSHLSSVPNLGRTQSSESAYV        | 299 |
| modified tail | 256 | KIKTAIRGVQARRKSICEIRKDD-V5-TurboID-VSHLSSVPNLGRTQSSESAYV | 380 |

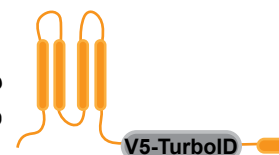

C

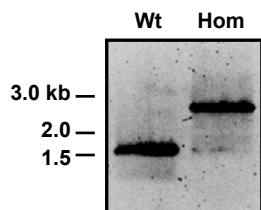

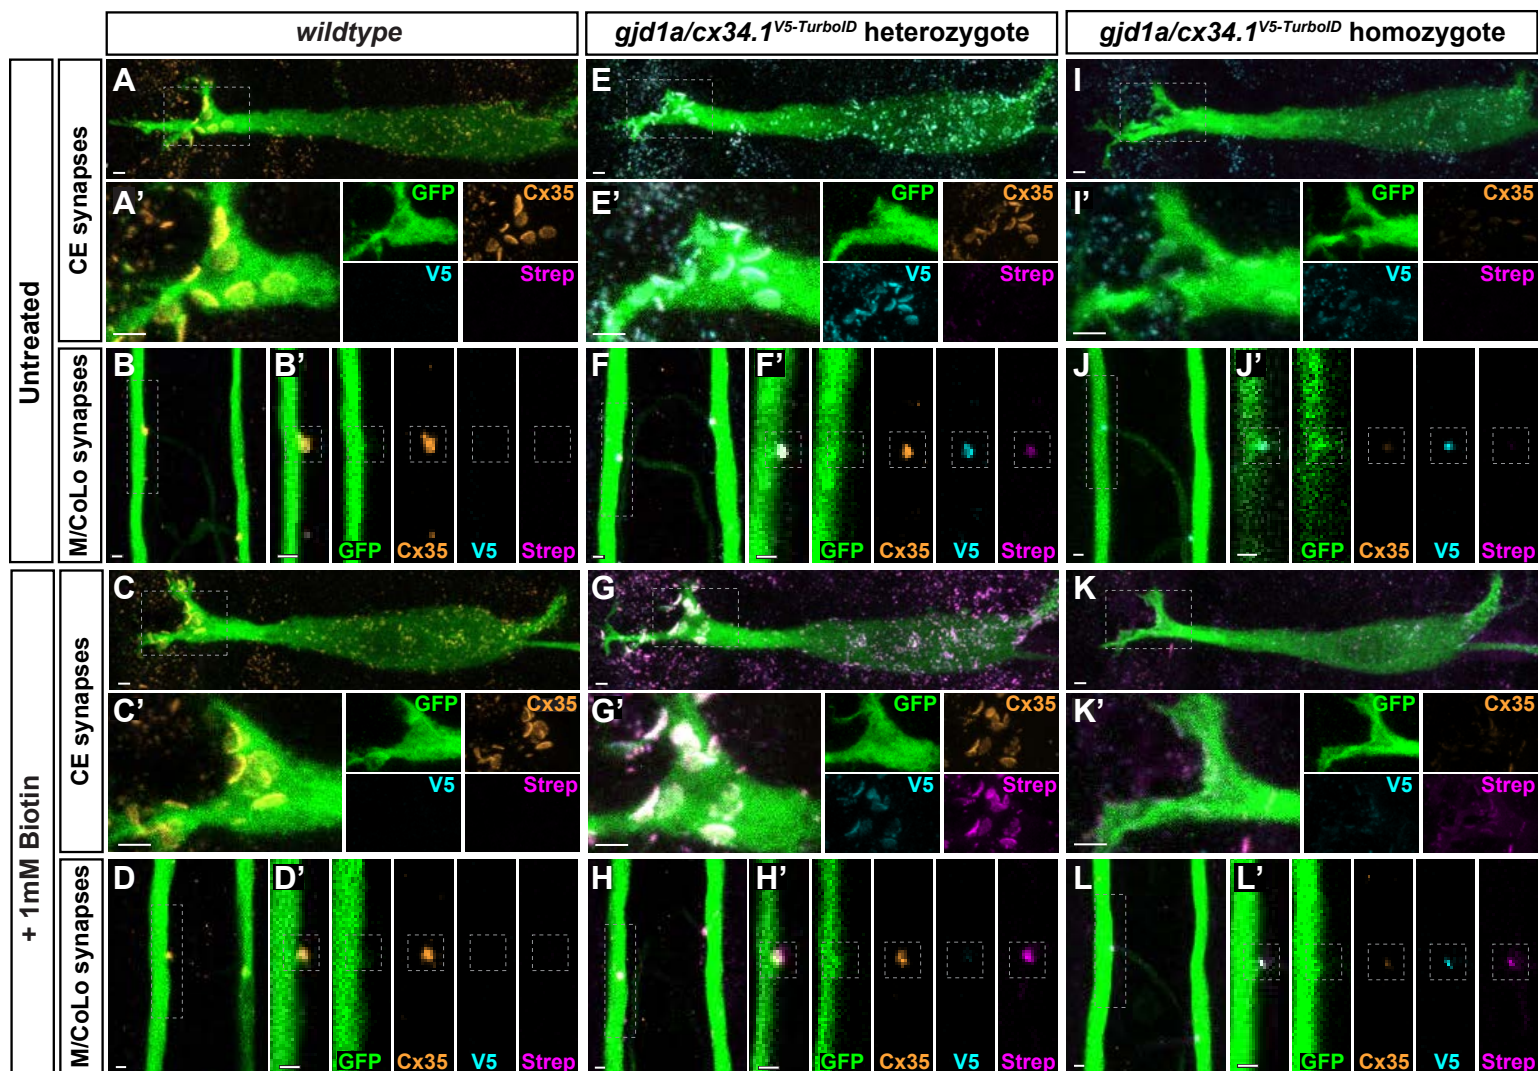

M

CE synapses

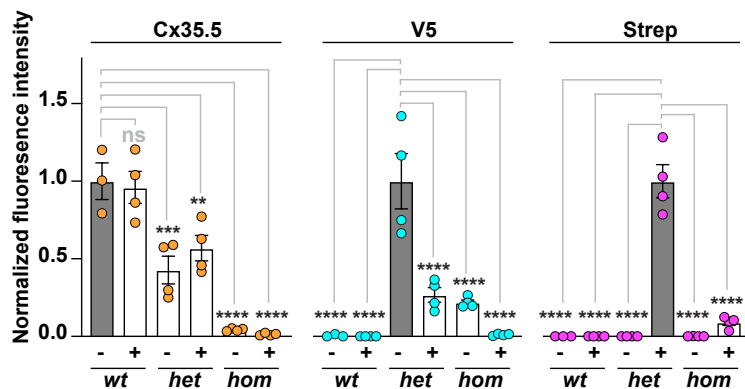

N

M/CoLo synapses

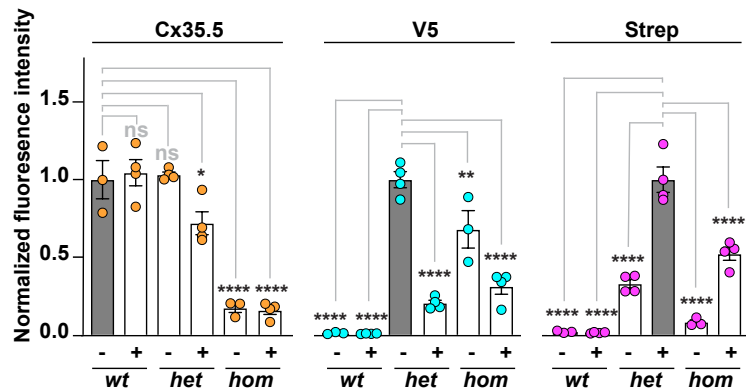

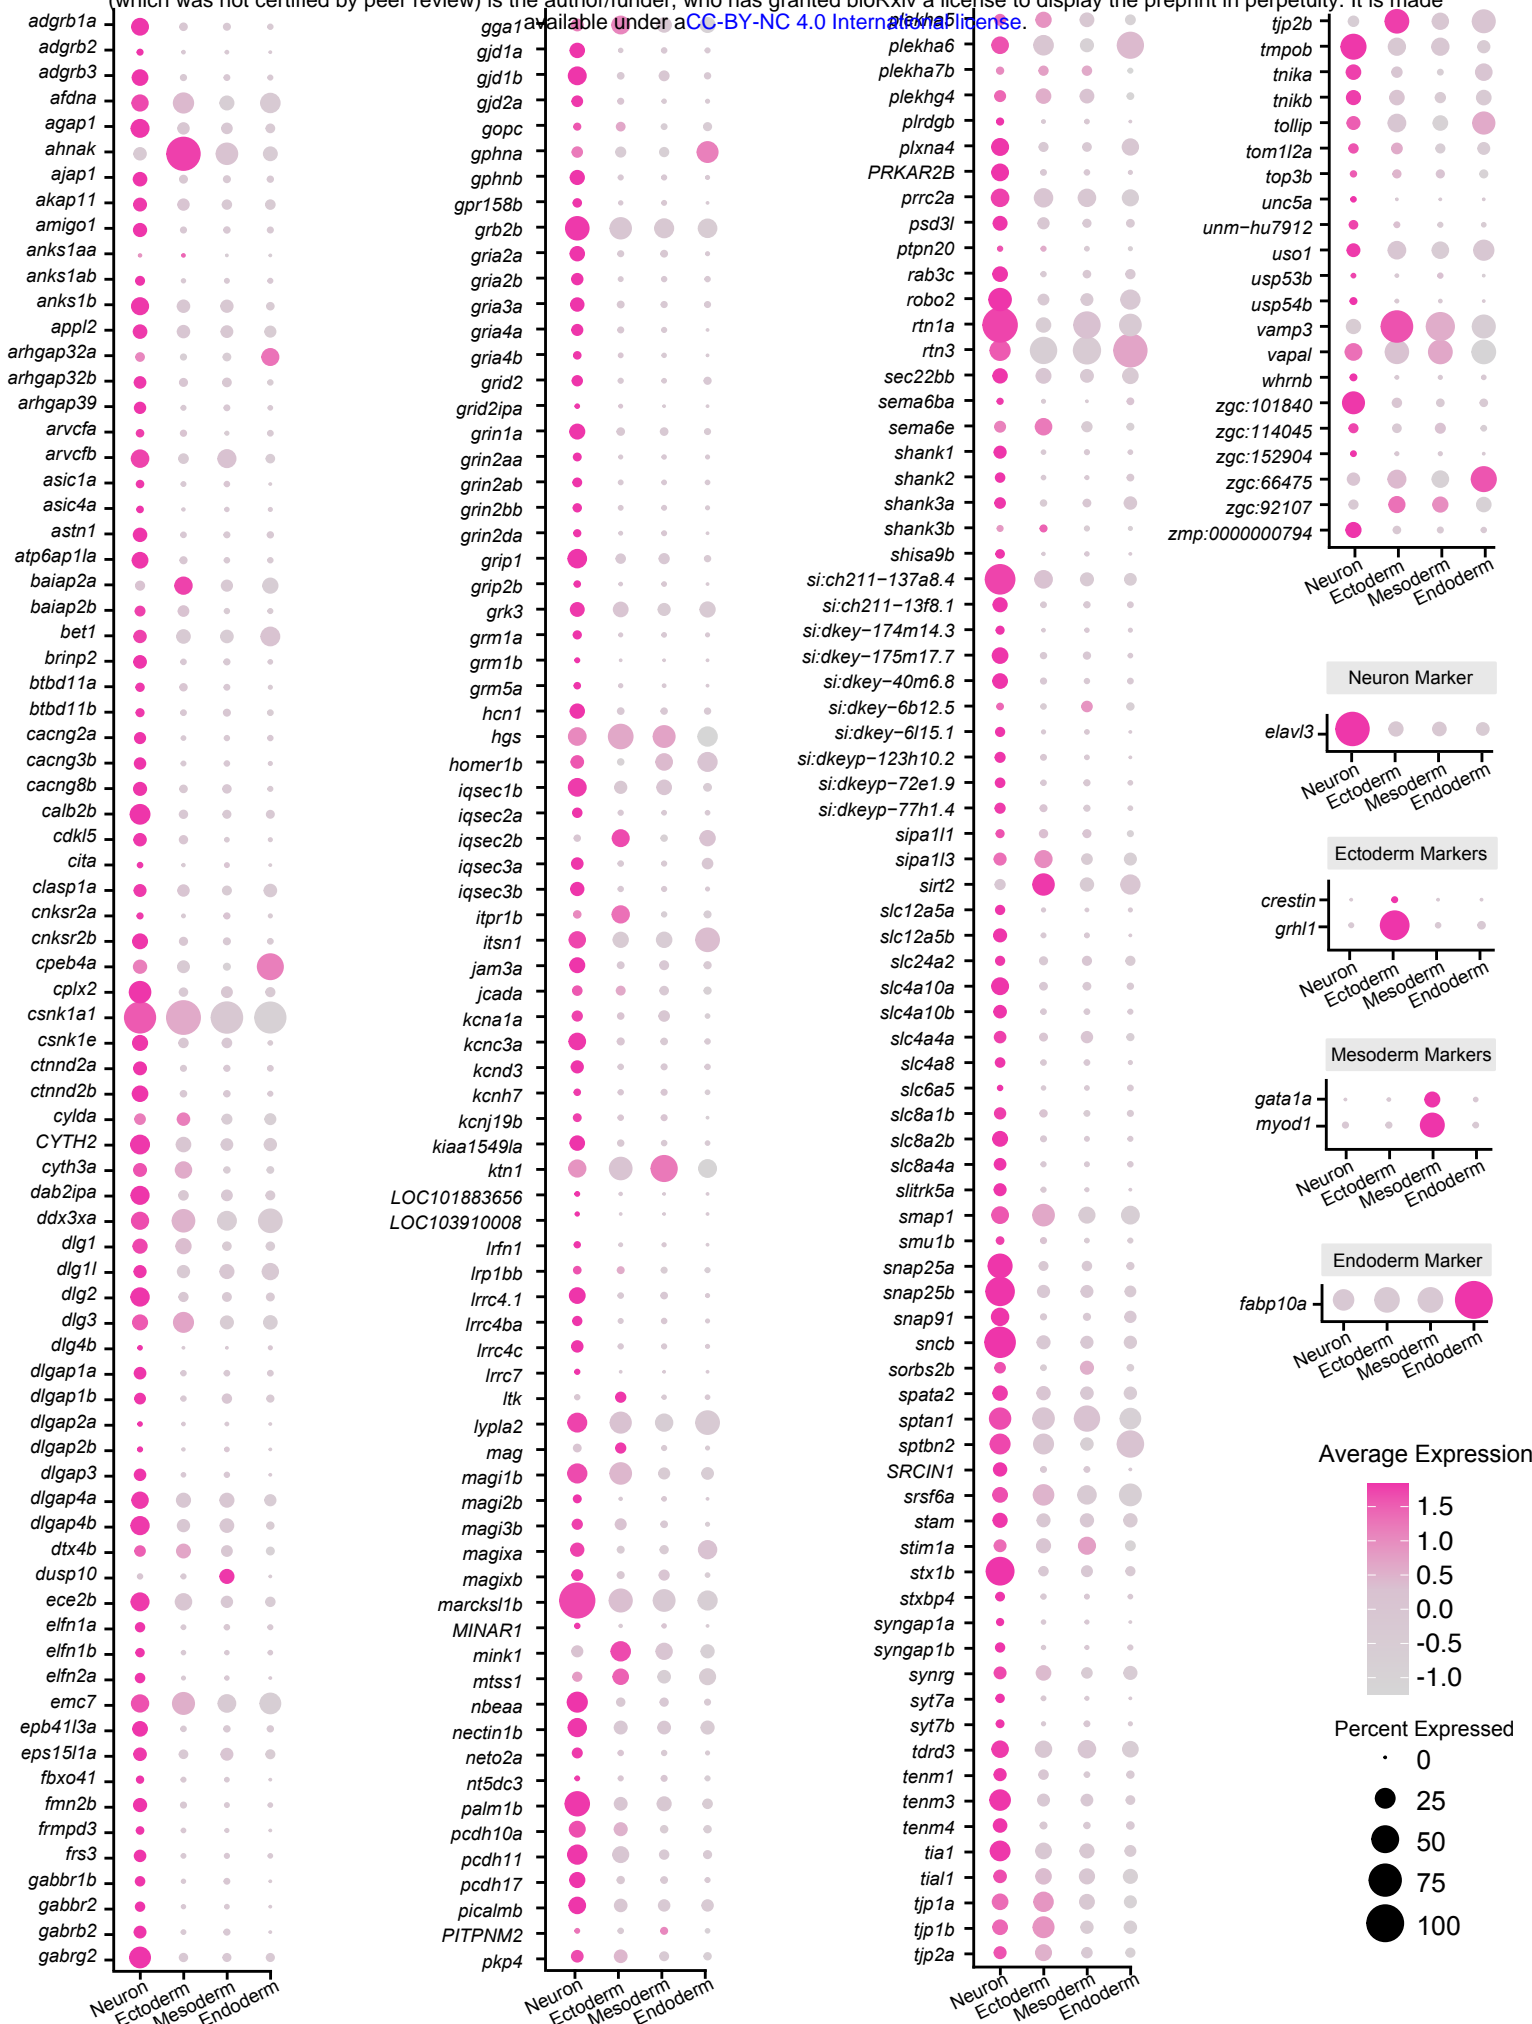



**Adgrb1a**

**No additional images.**

**Adgrb3**

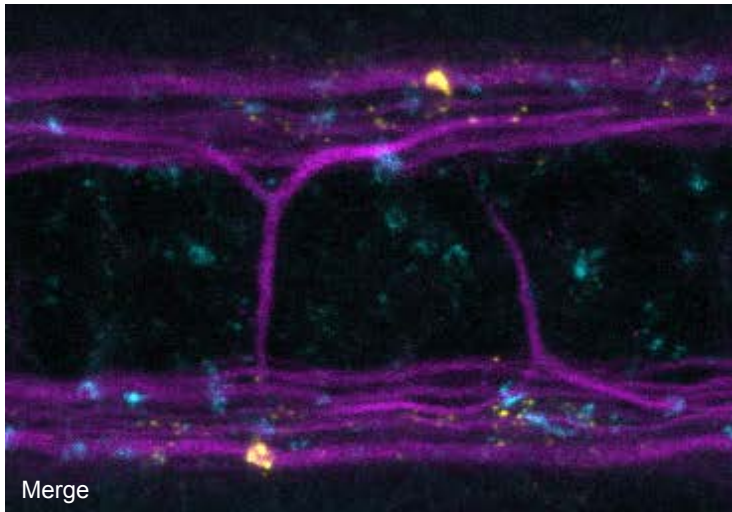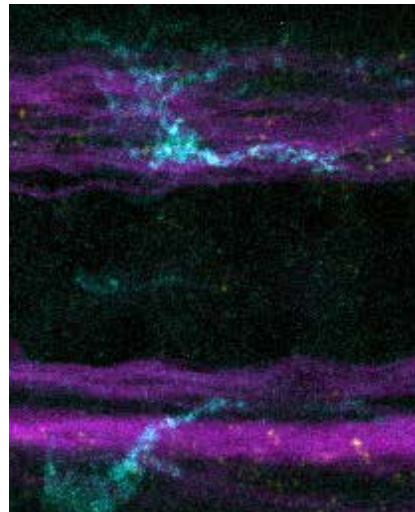

## Afdna

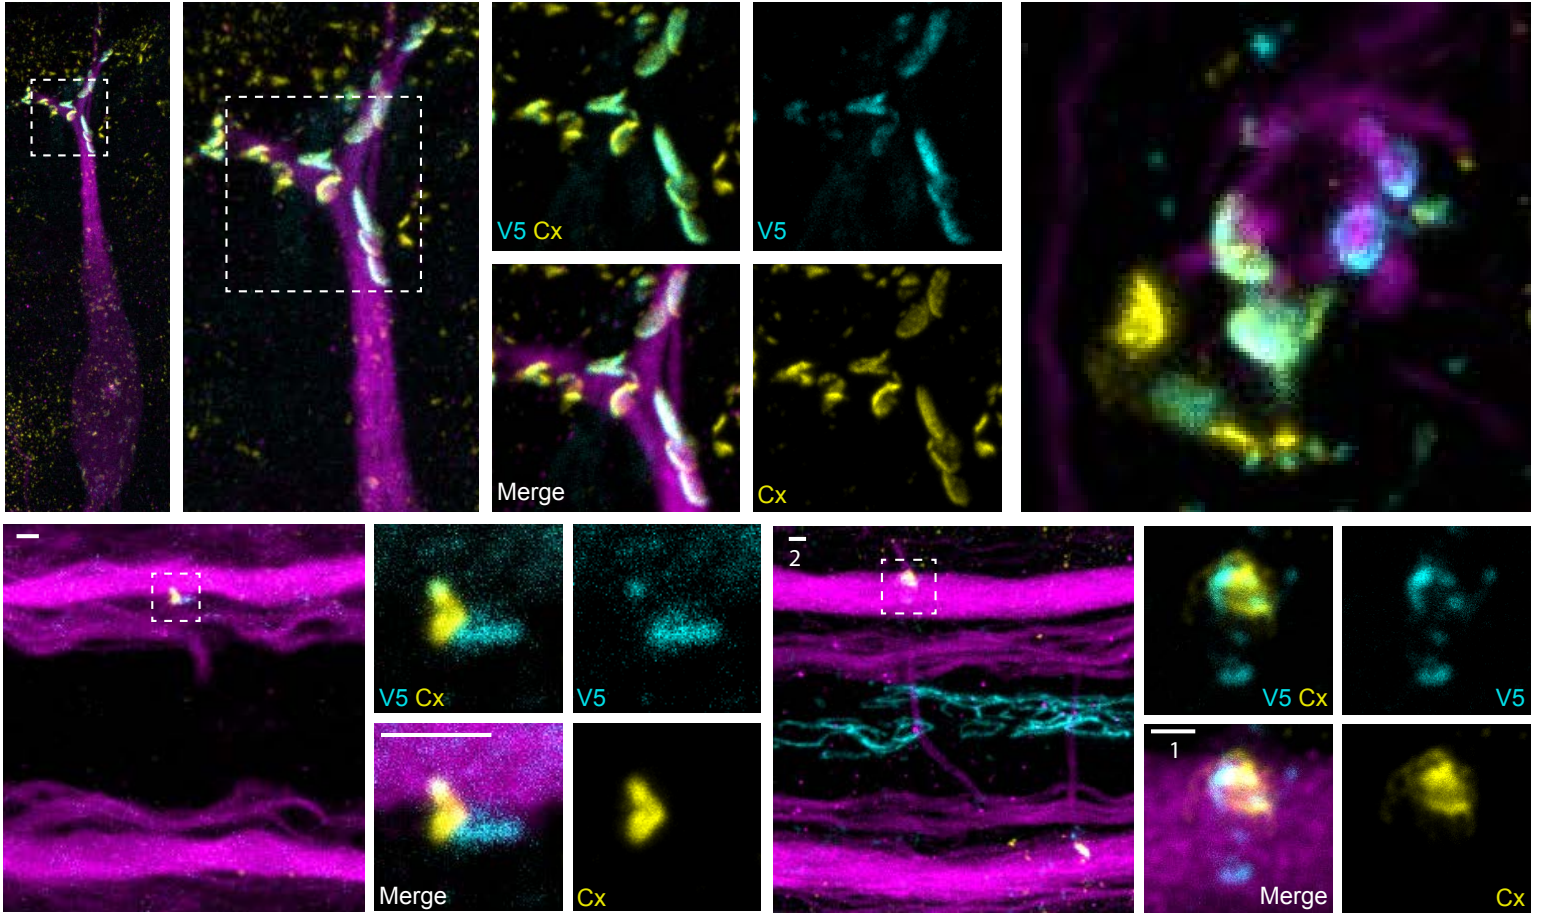

## Amigo1

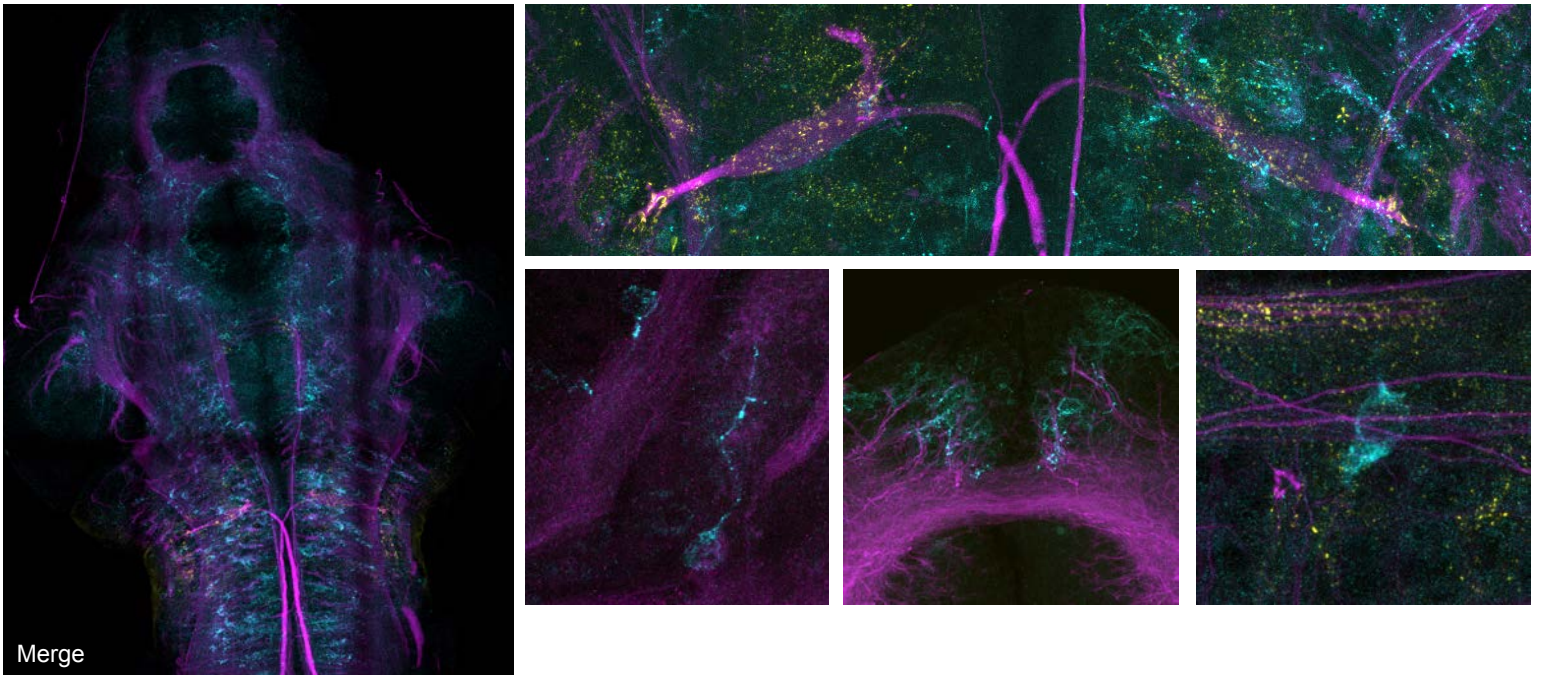



### Arvcfa

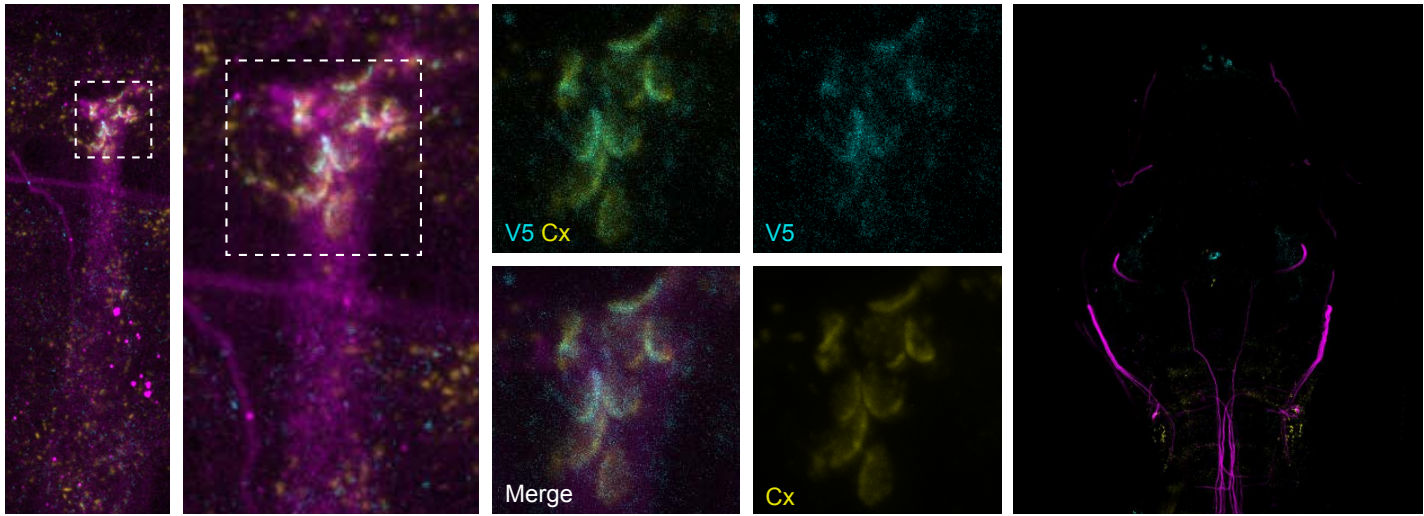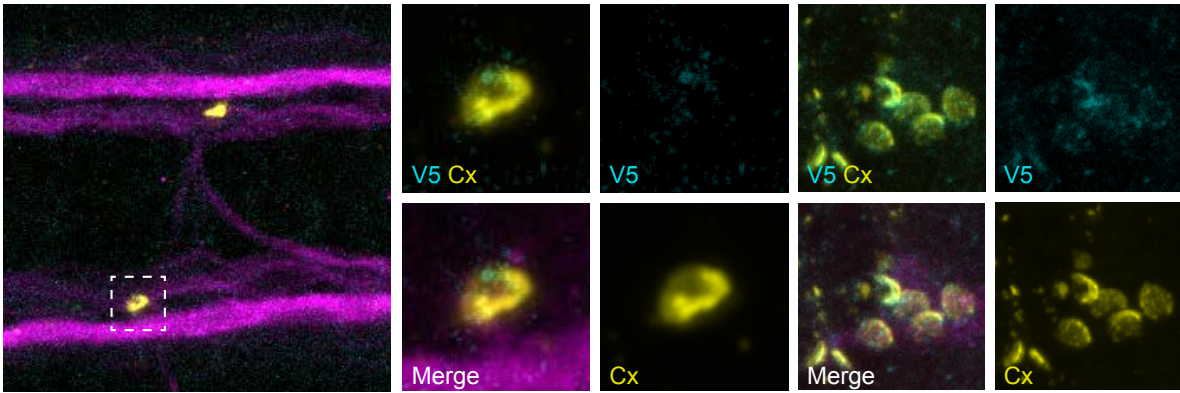

### Arvcfb

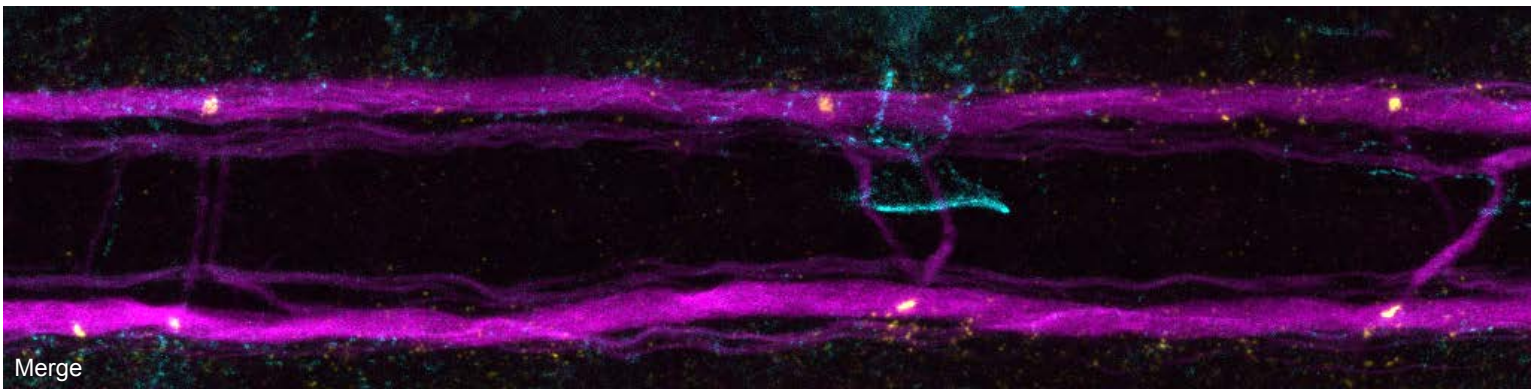



## Astn1

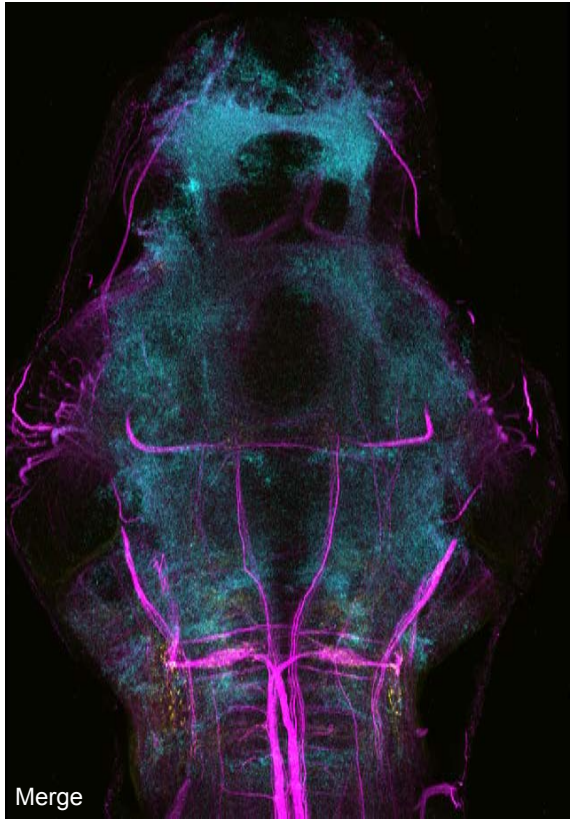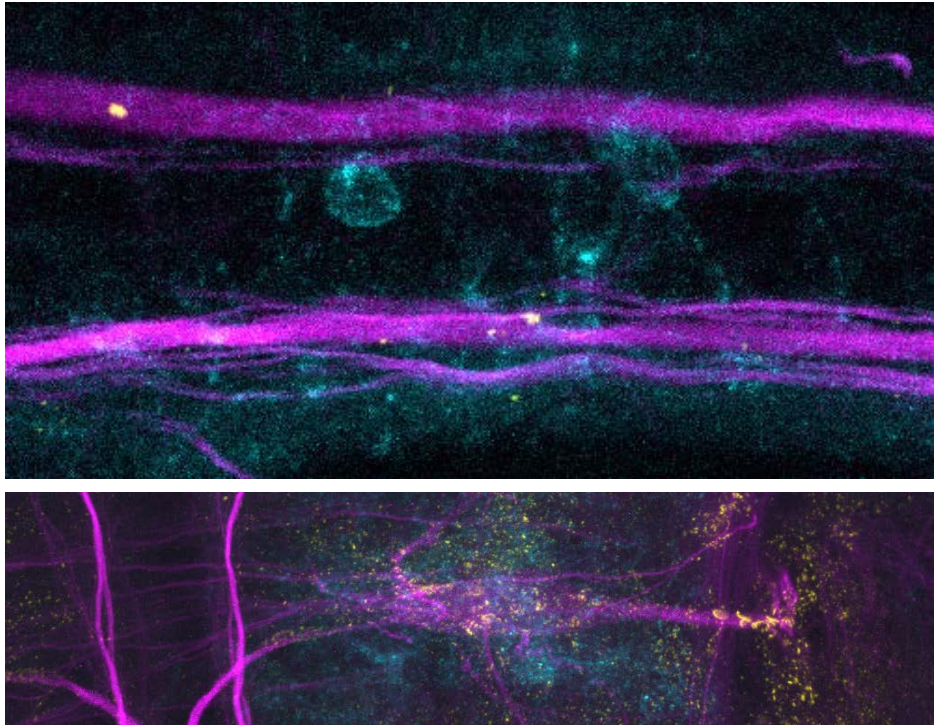

## Band4.1

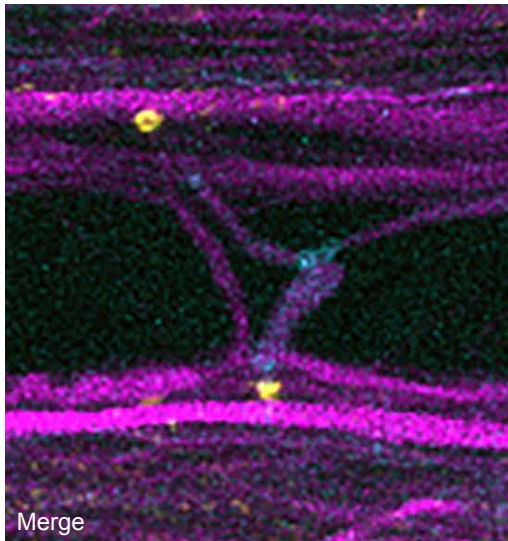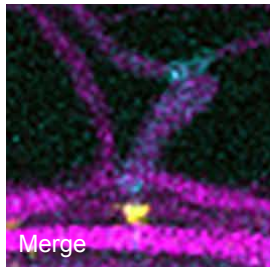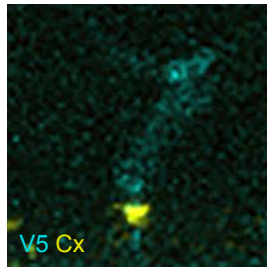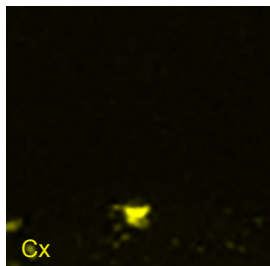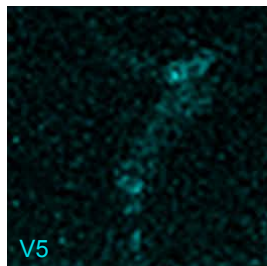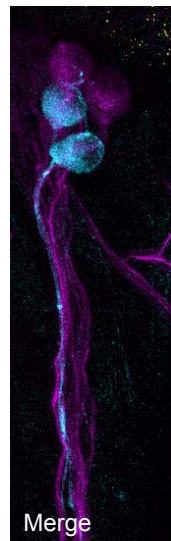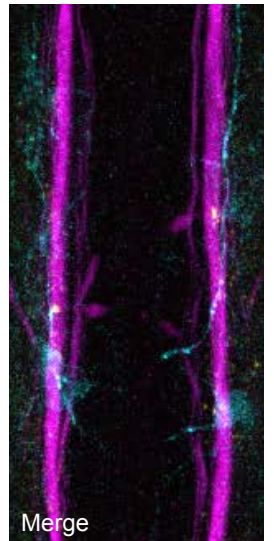



### Cdk15

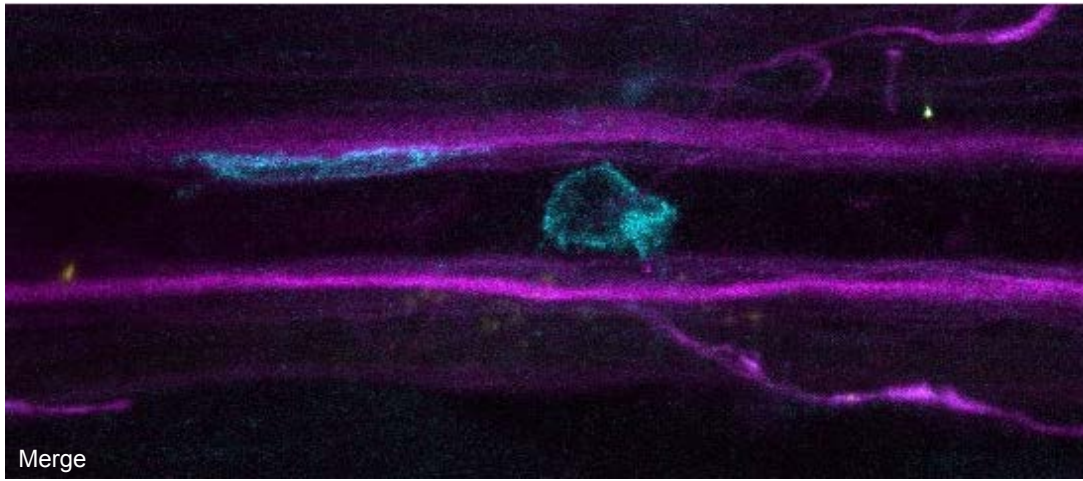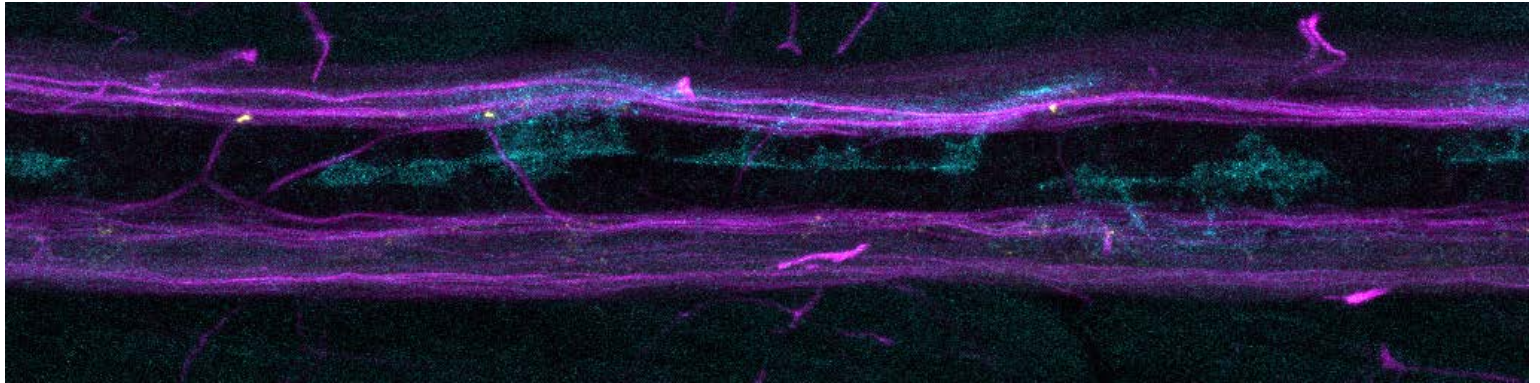

### Clmpb

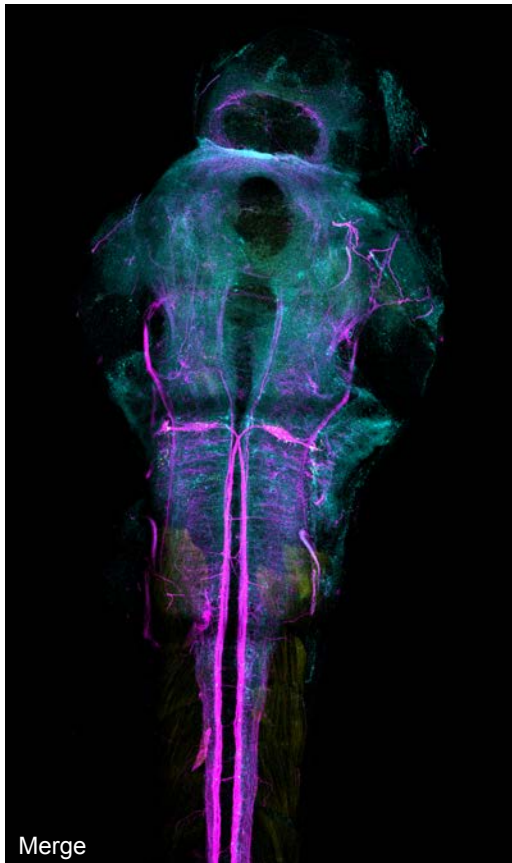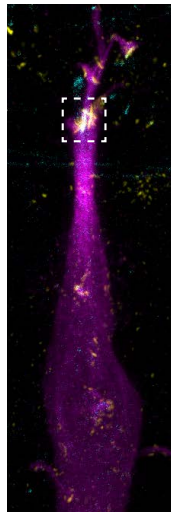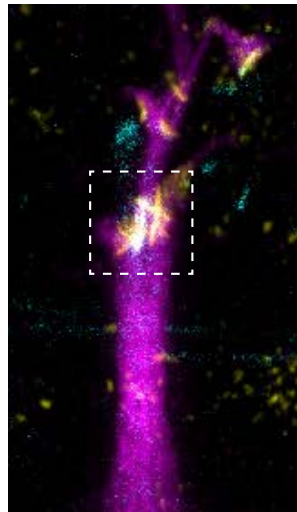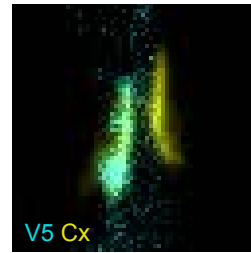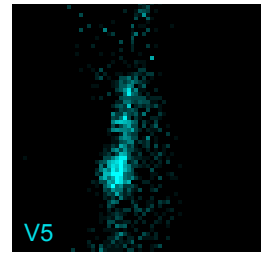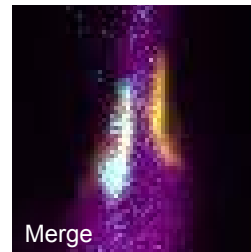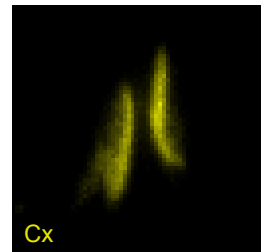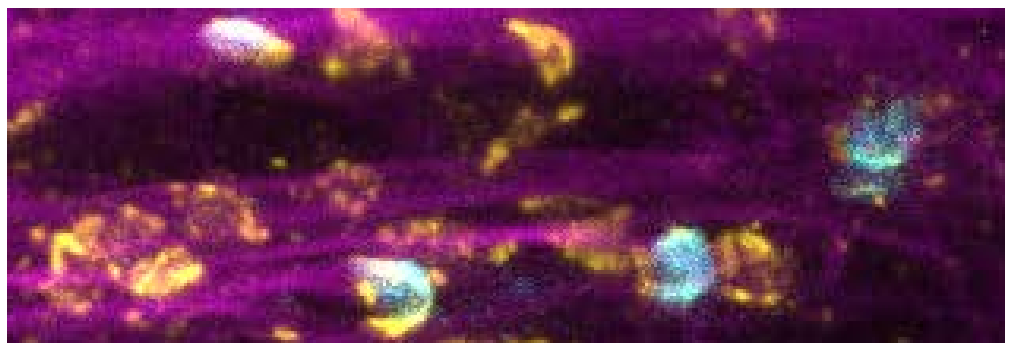



### Ctnnd2a

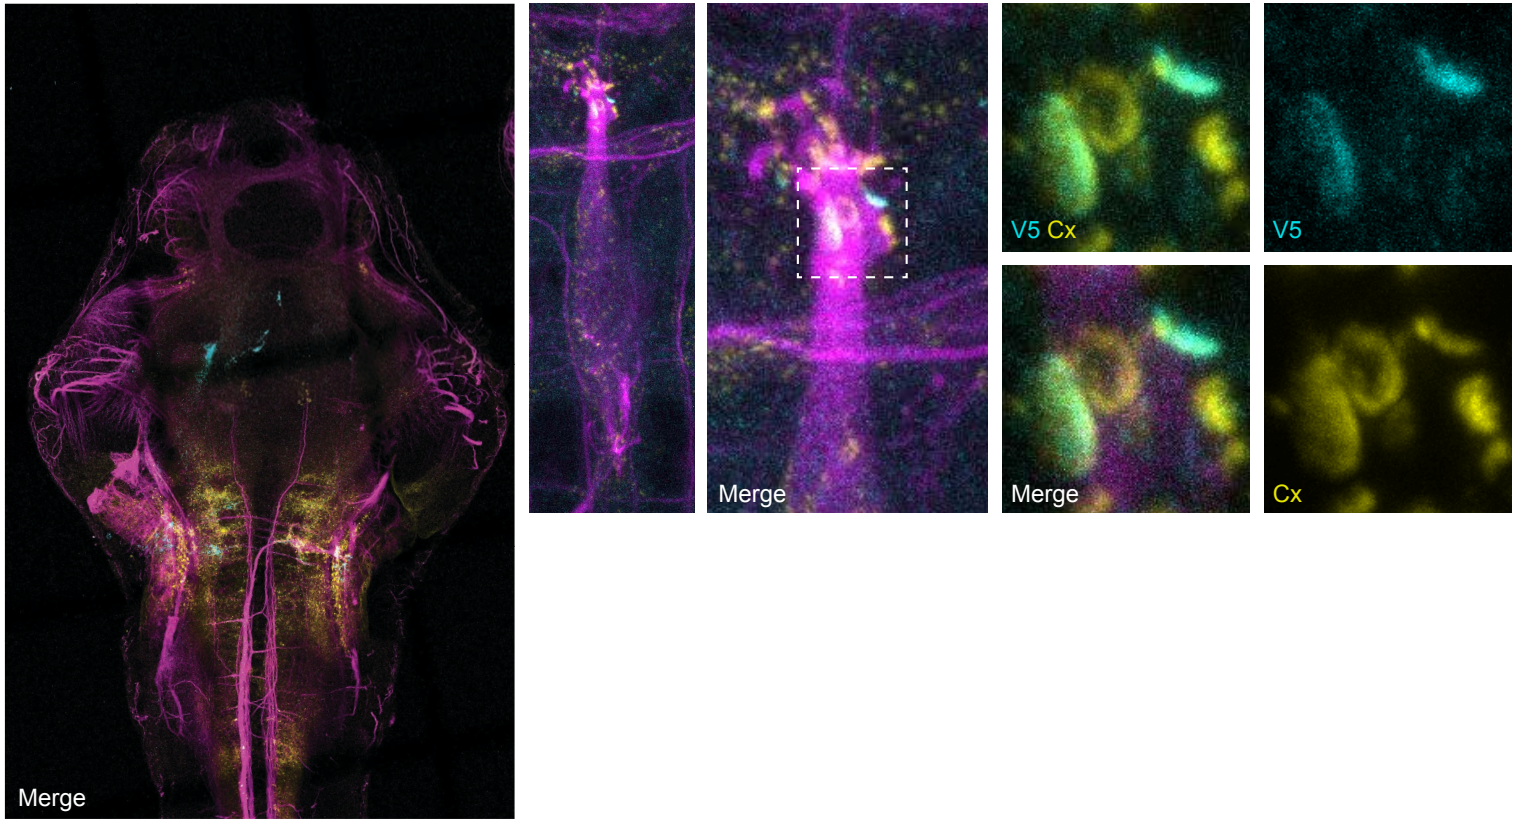

### Ctnnd2b

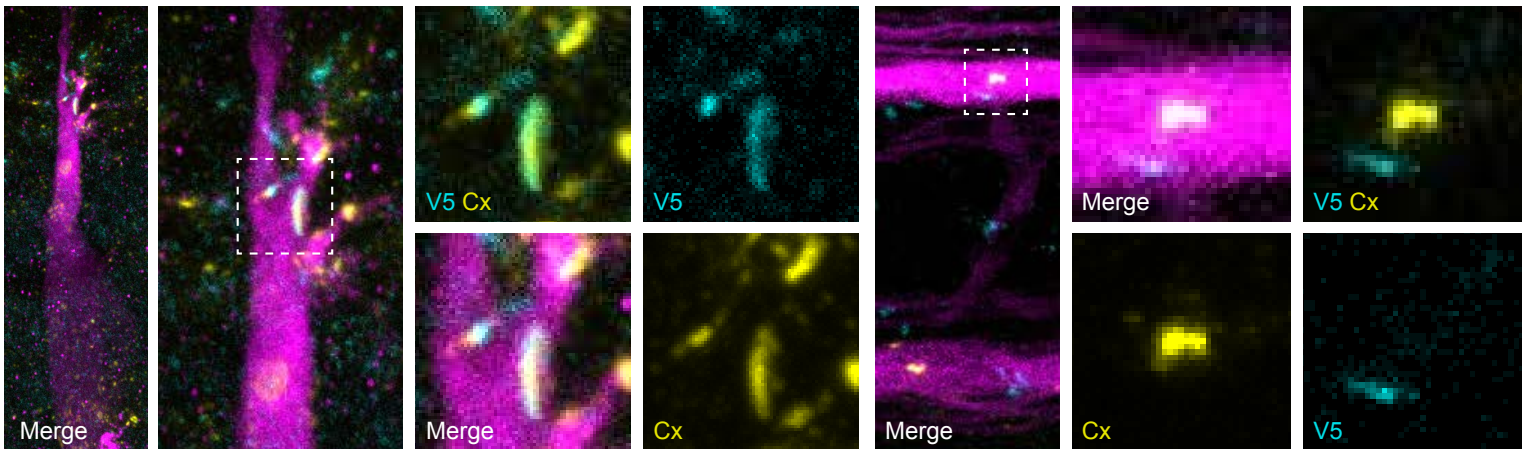



### Ddx3xa

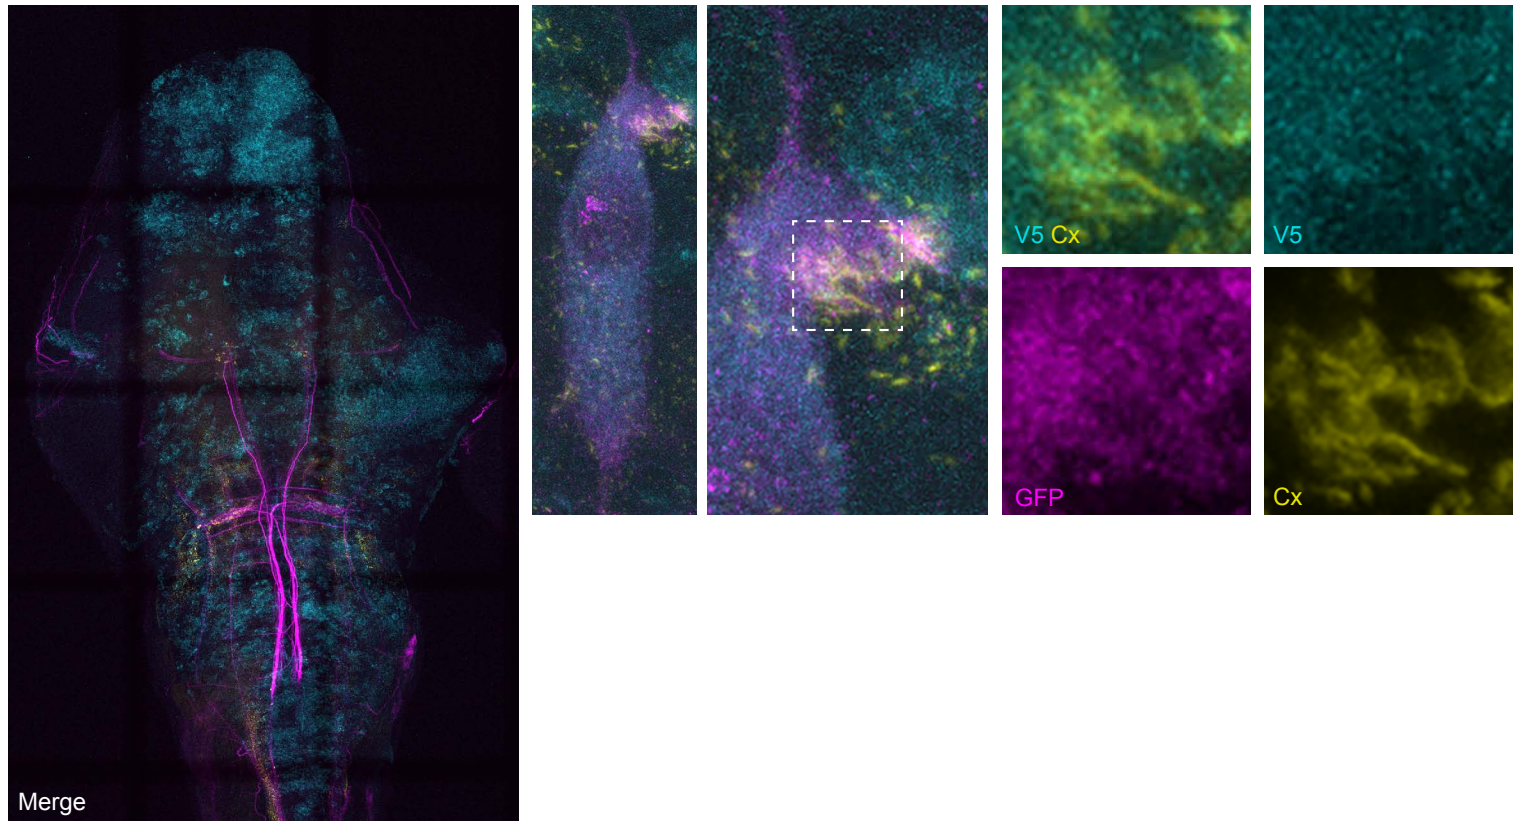

### Dlg1b

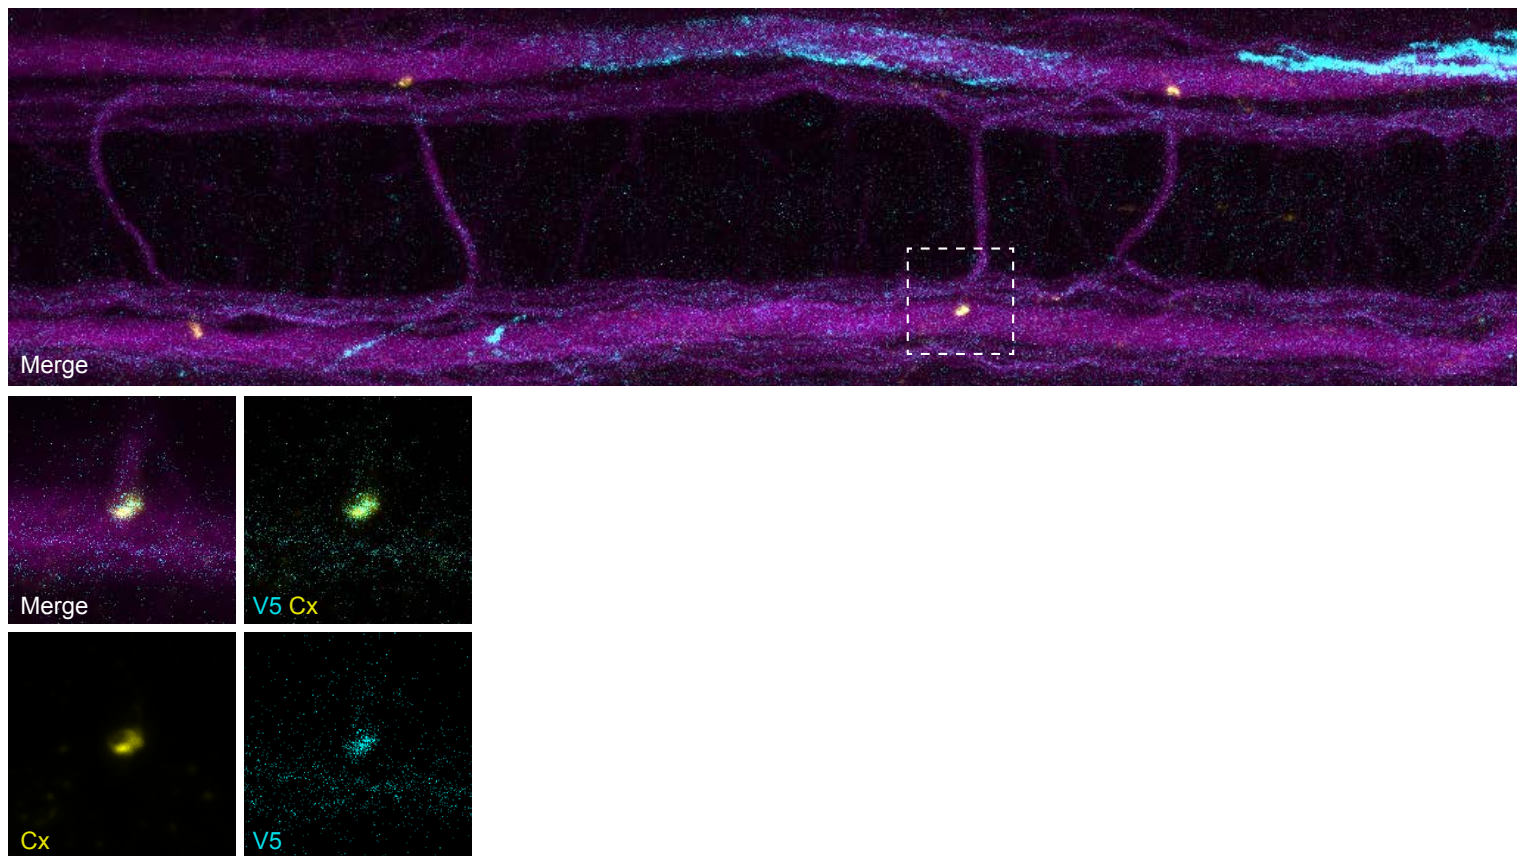



## Dlg2

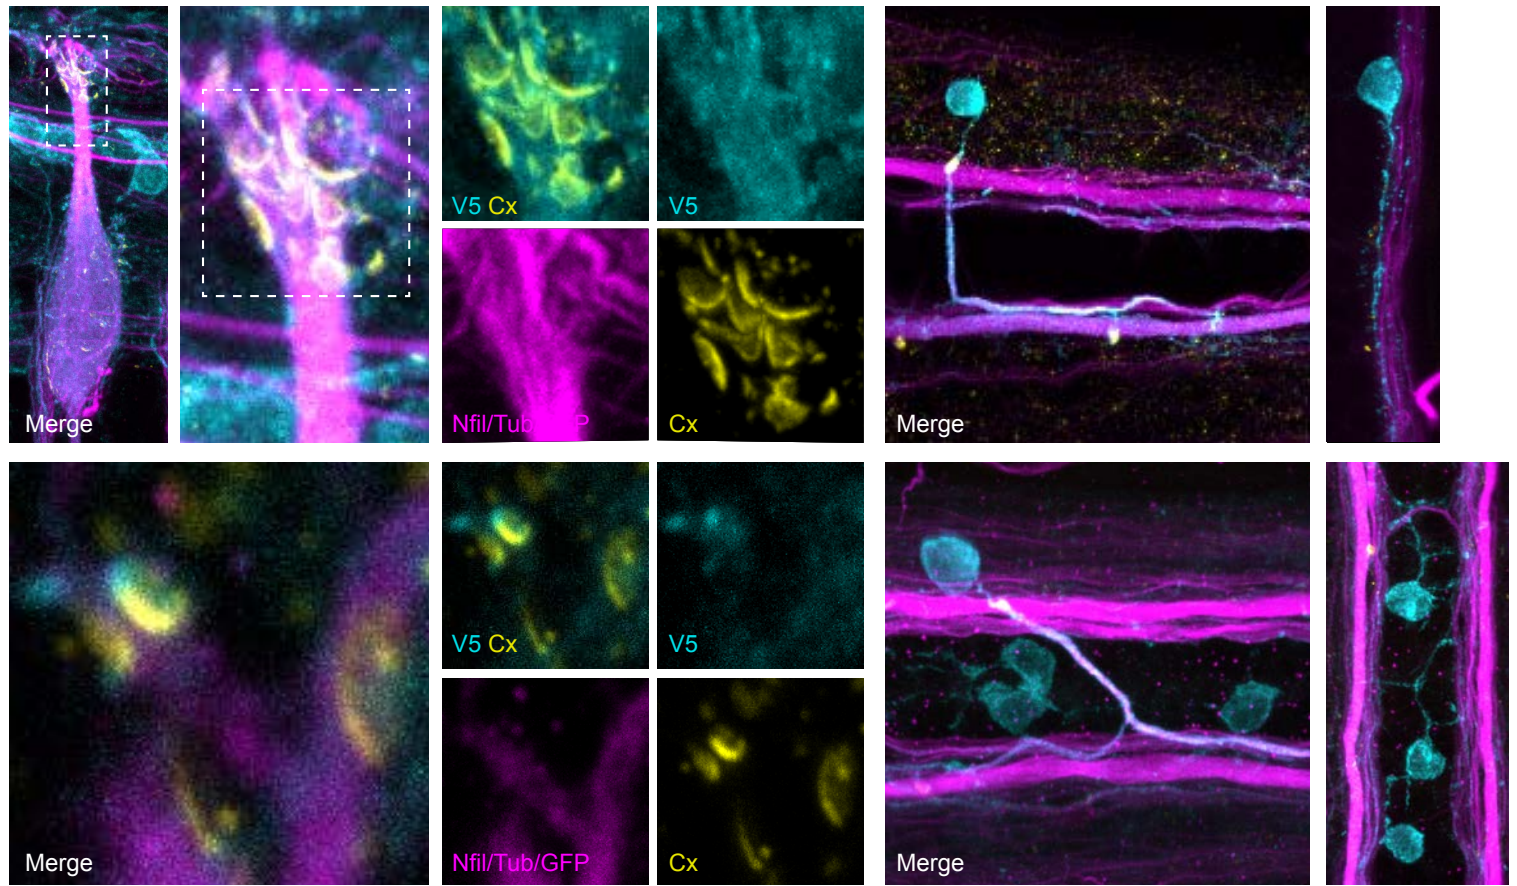

## Dlg3/Sap102

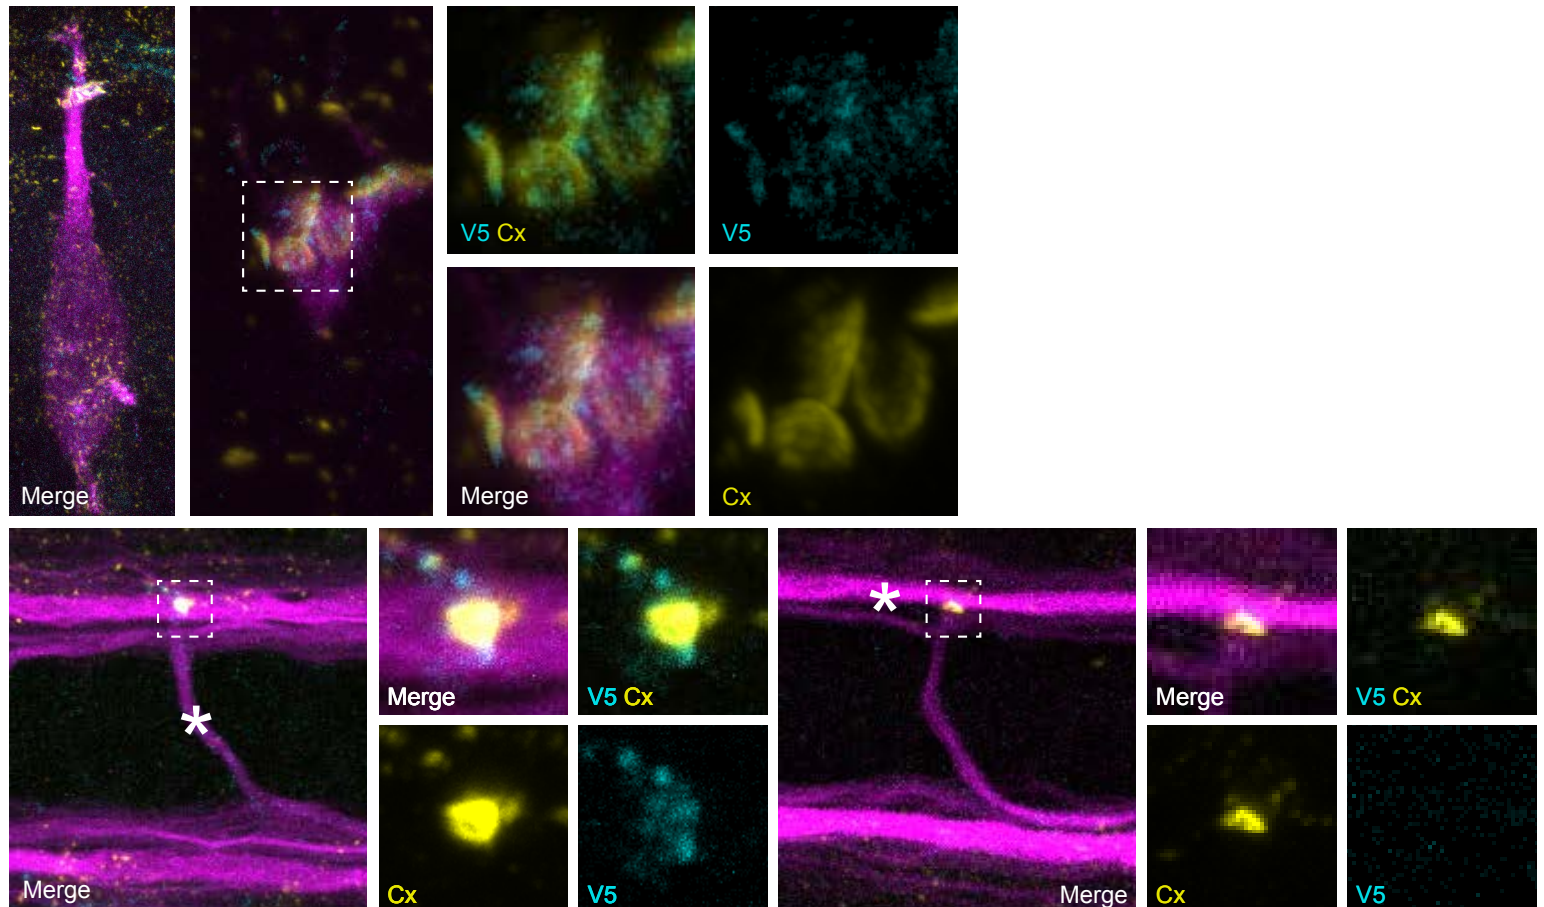



### Elfn1b

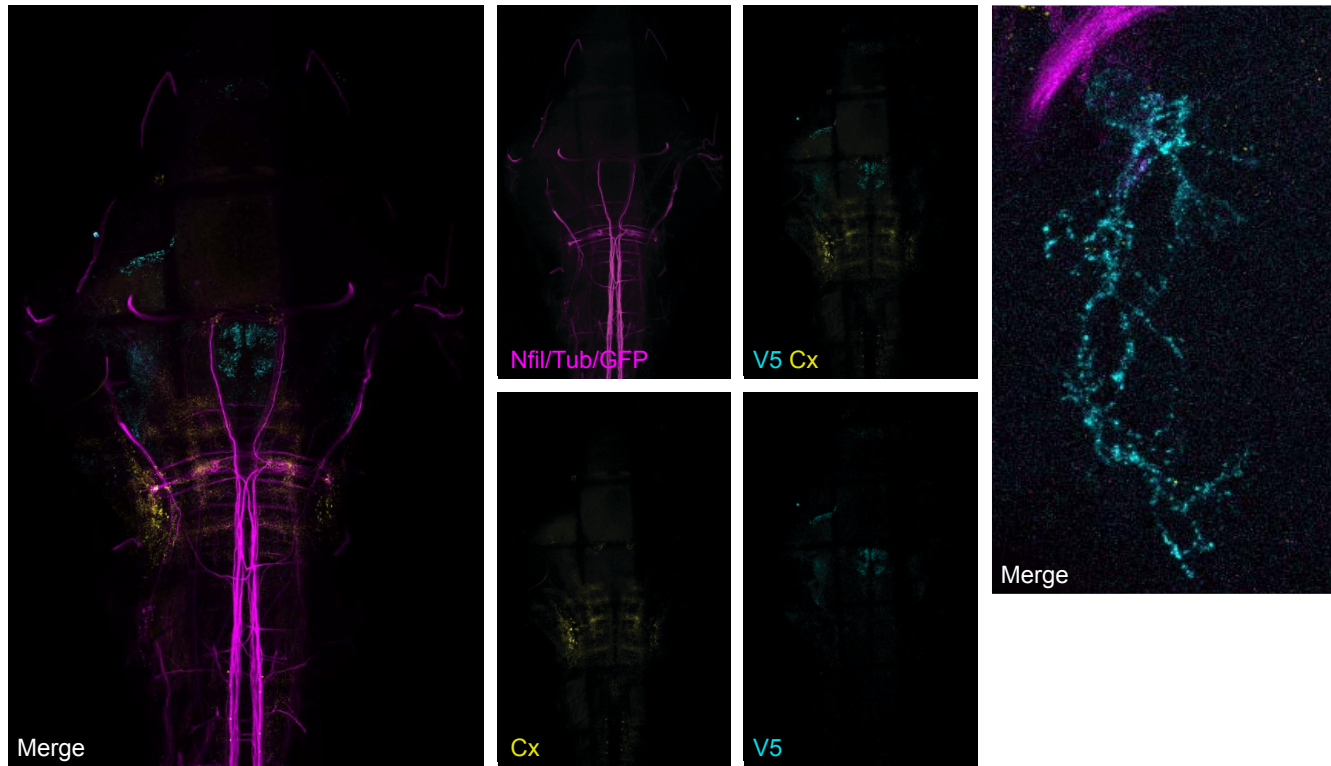

### Frmpd3

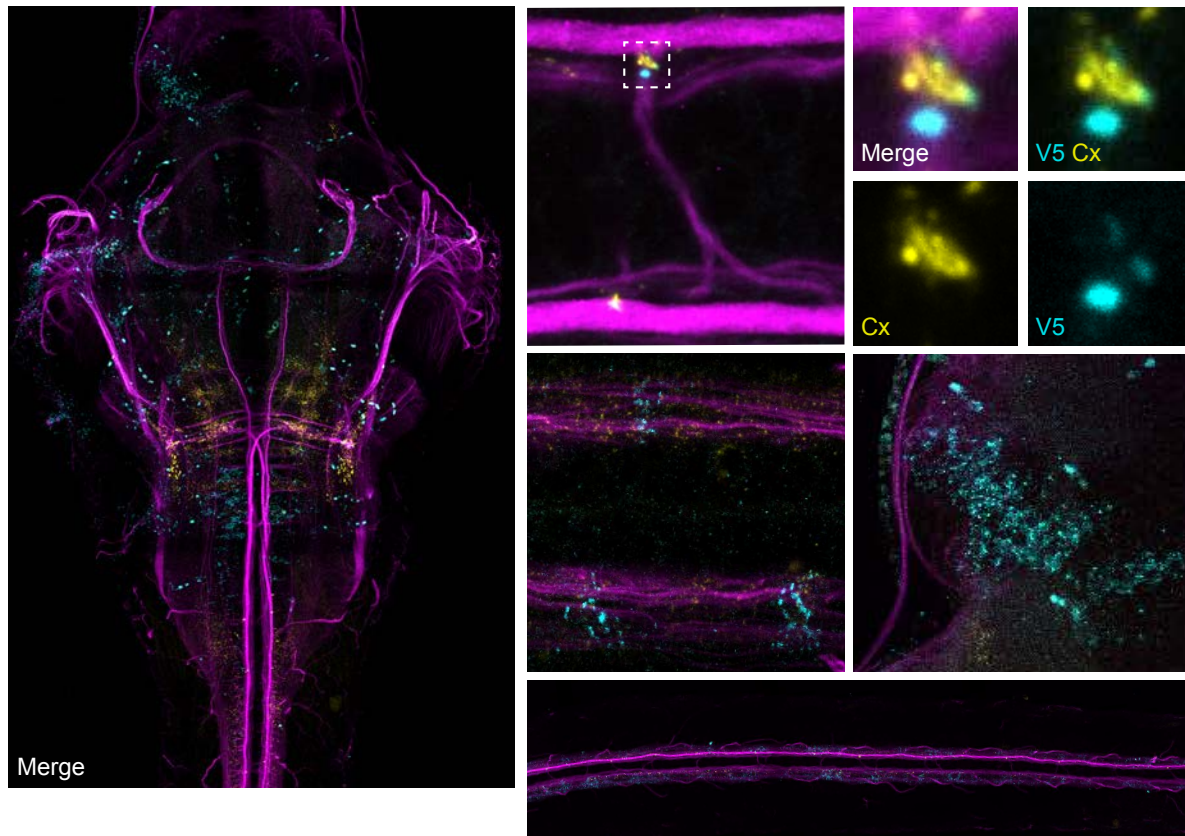

## Gria2a

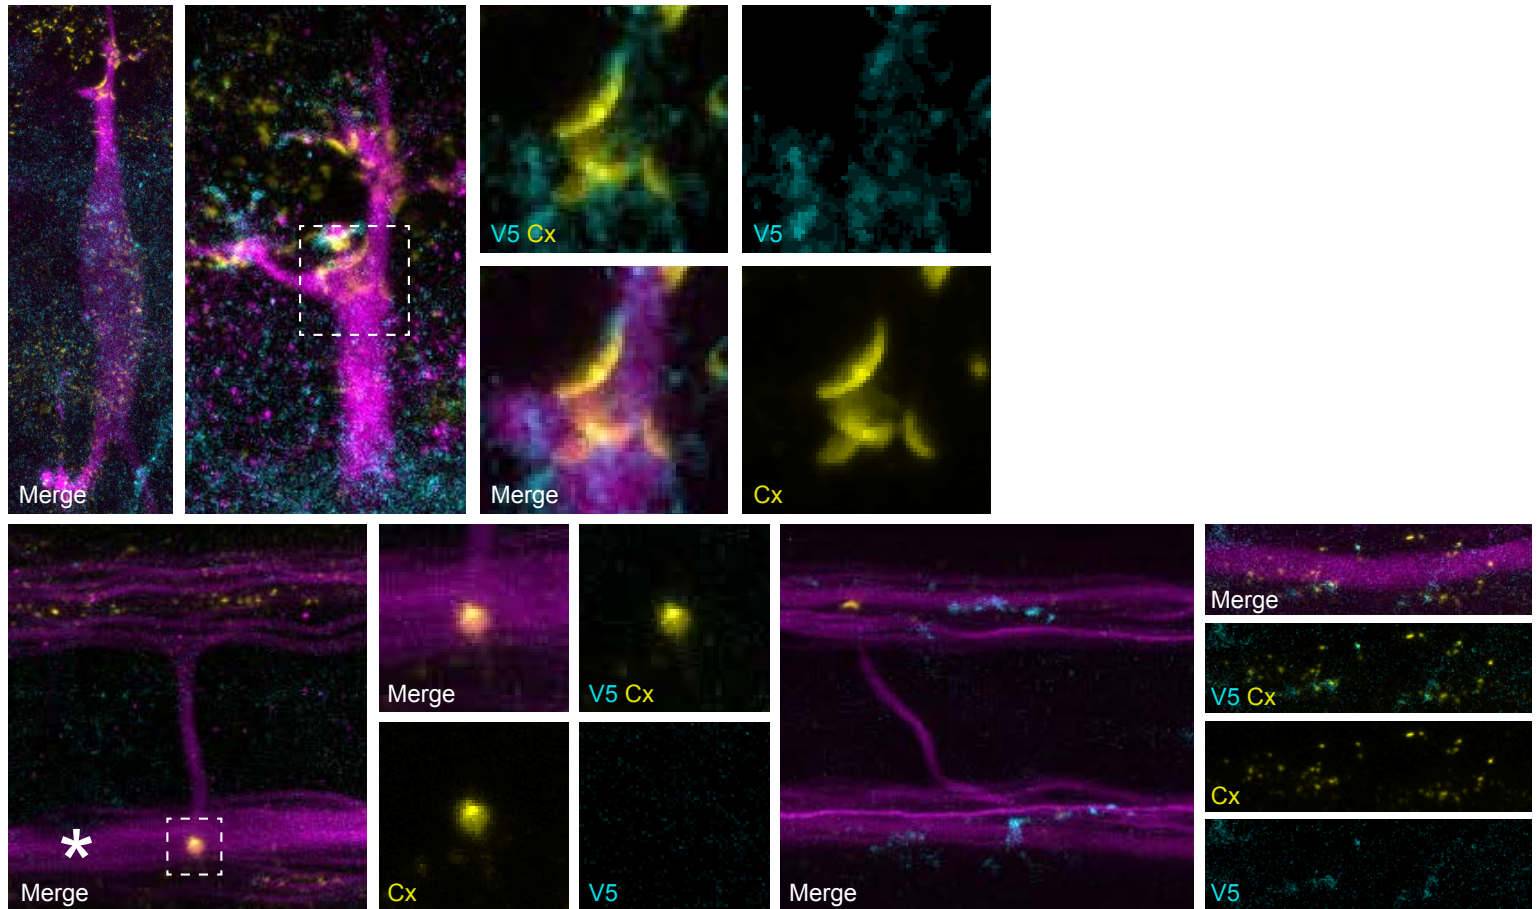

## Grip1

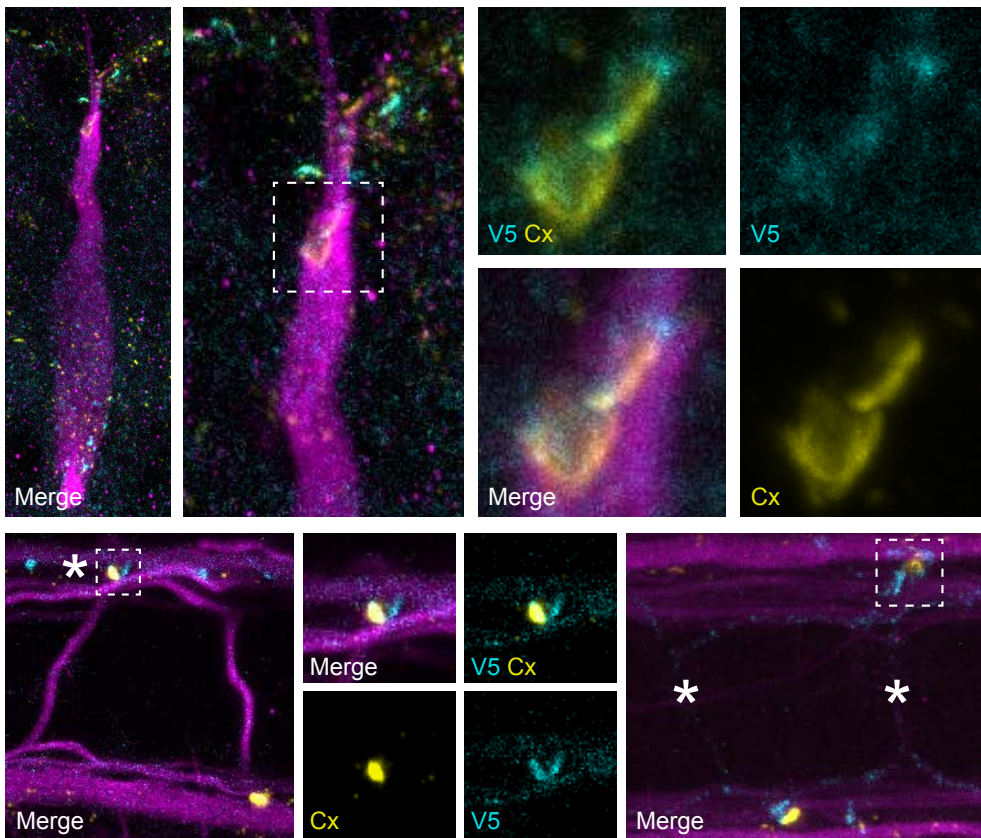



### Grk3

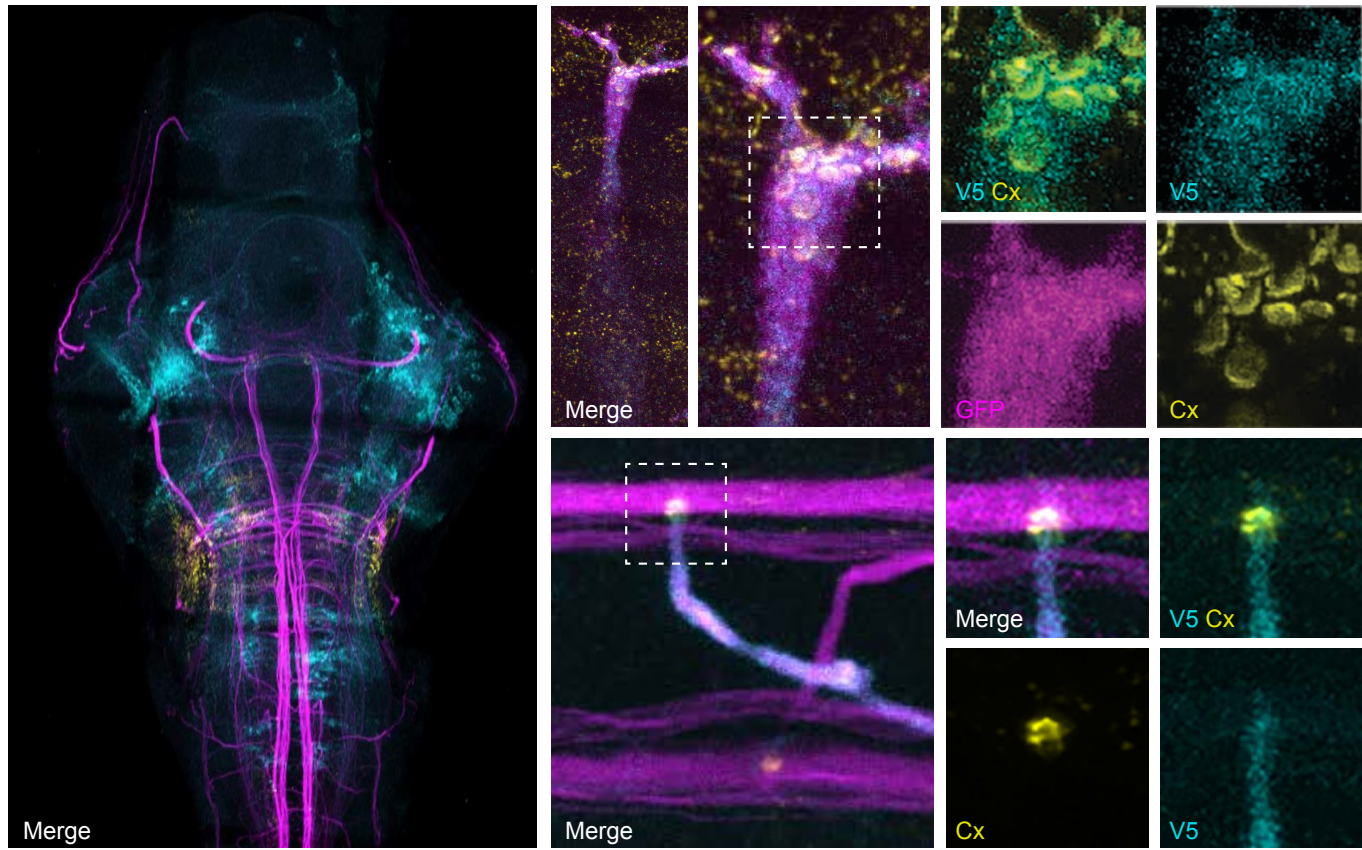

### lqsec2b

No additional images.

### Jam3a

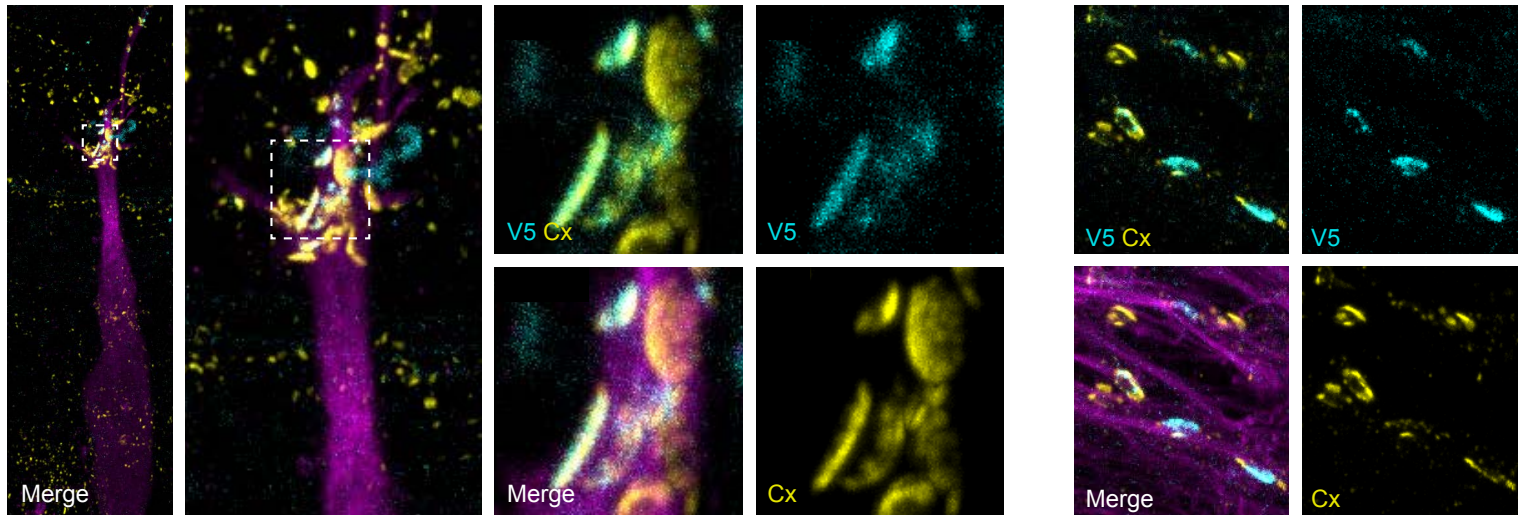

### Lrfr1

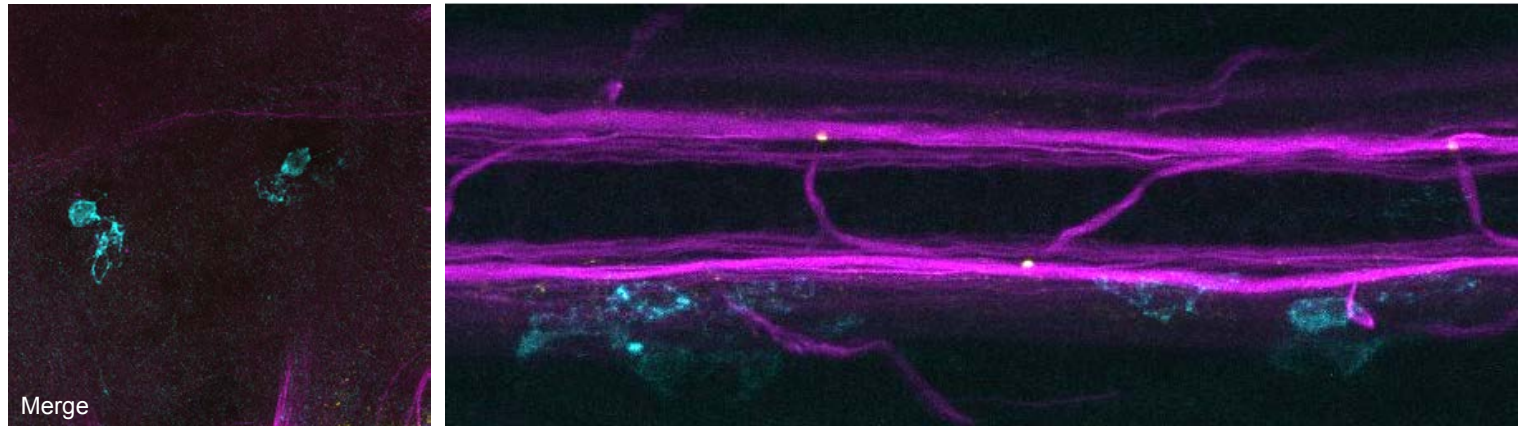



**Lrrc7**

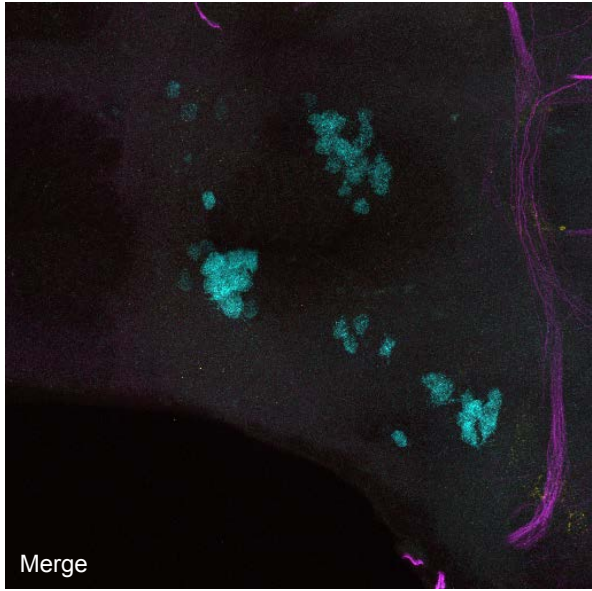

**Magi1b**

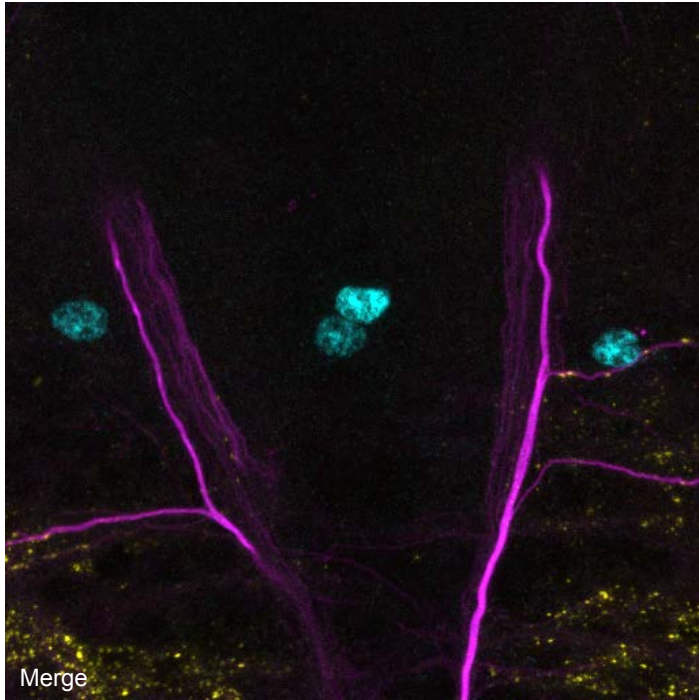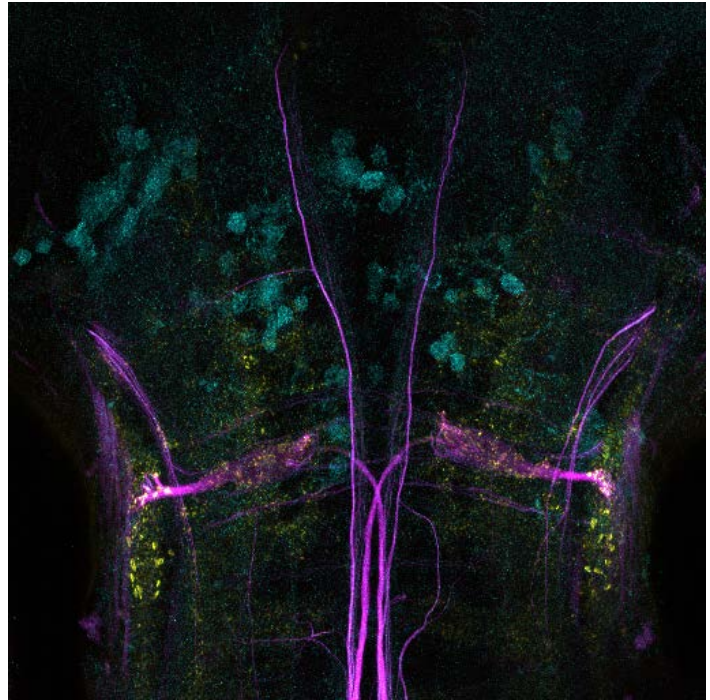

## Magixa

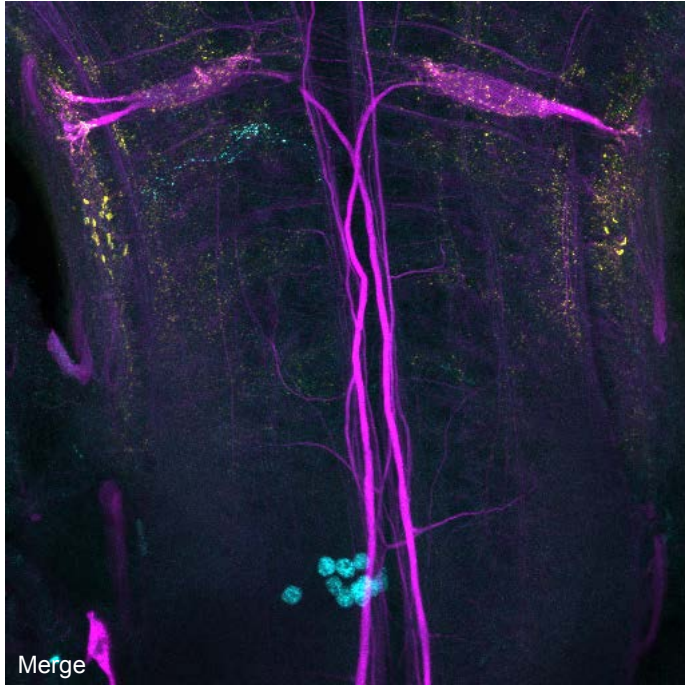

## Ncam2

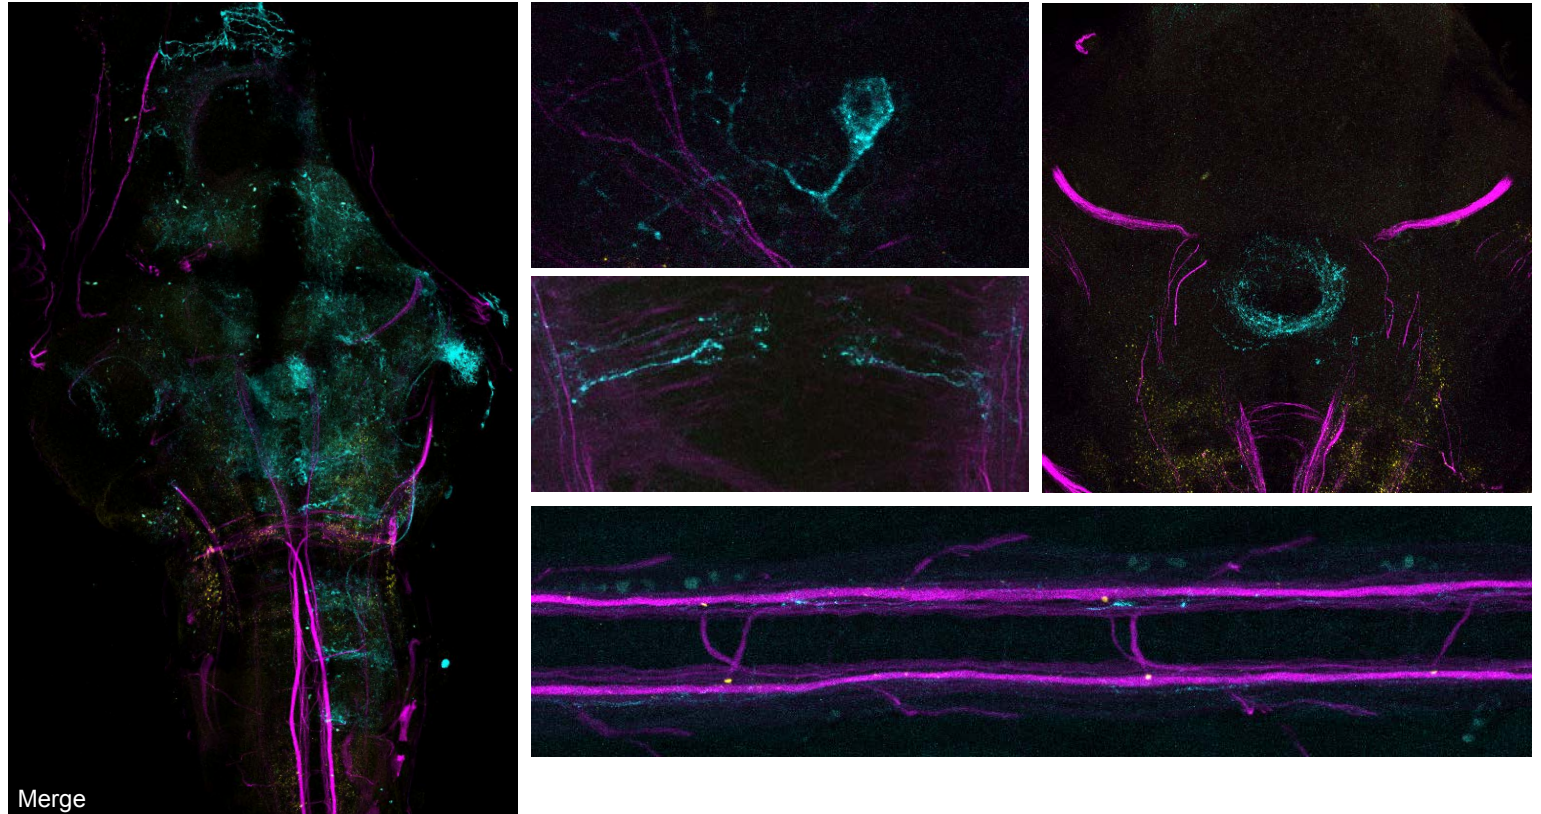



## Nectin1b

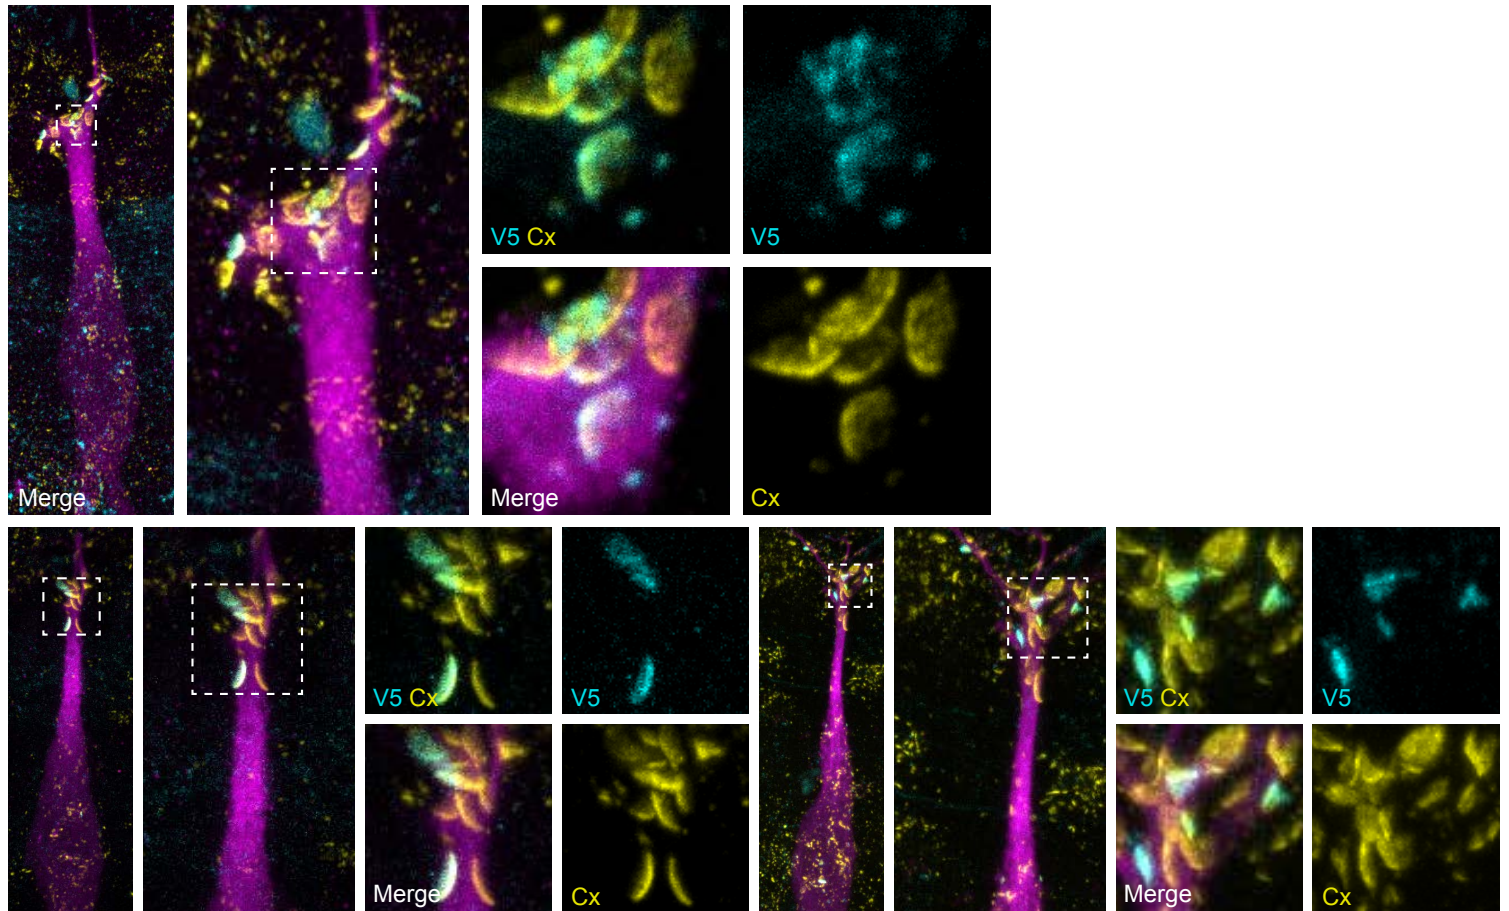

## Plekha5

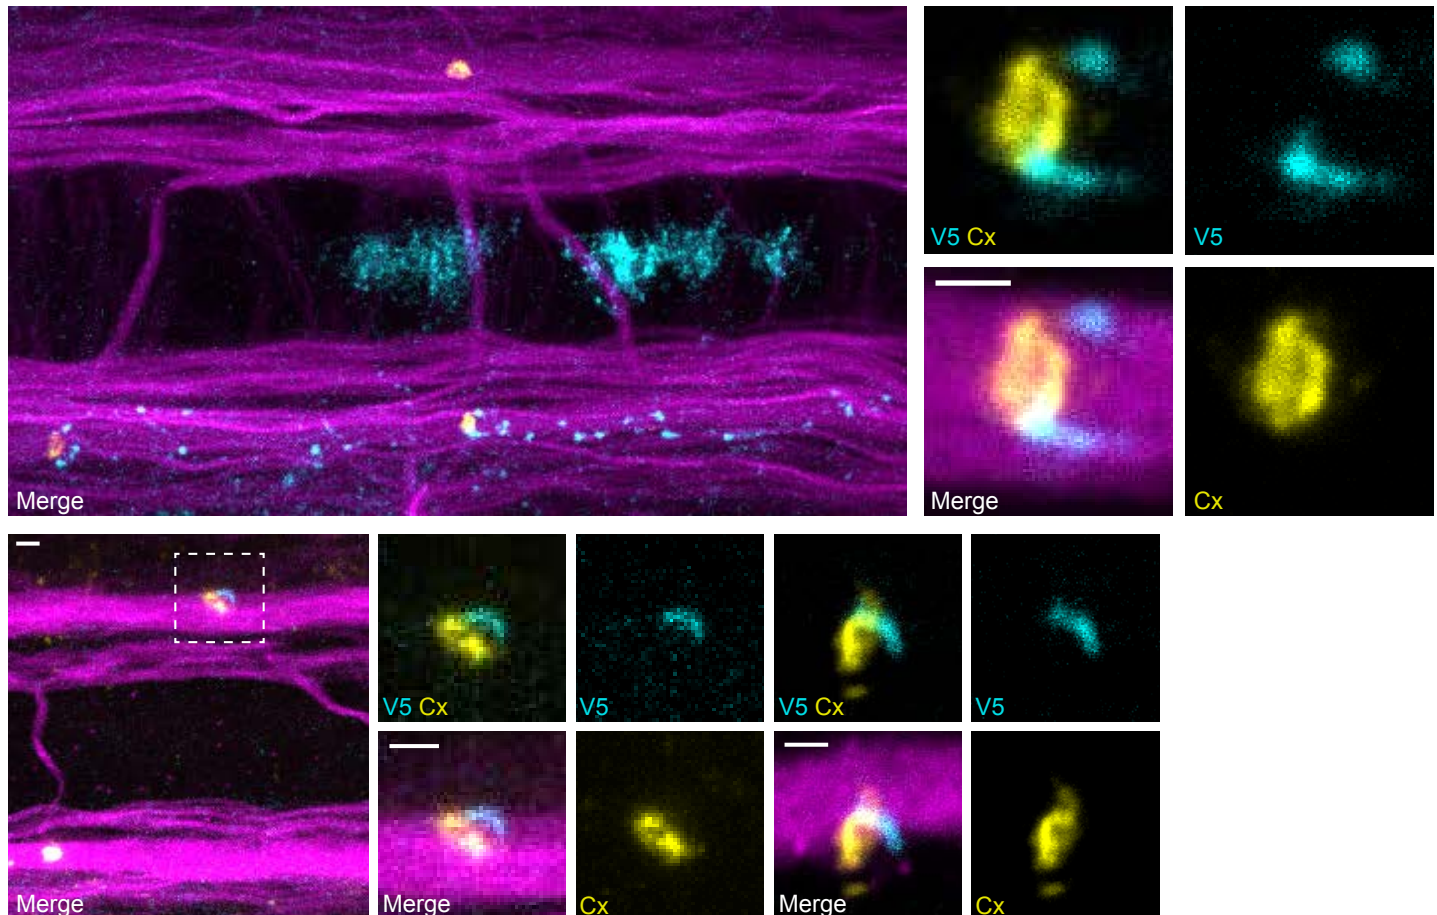



### Psd3l

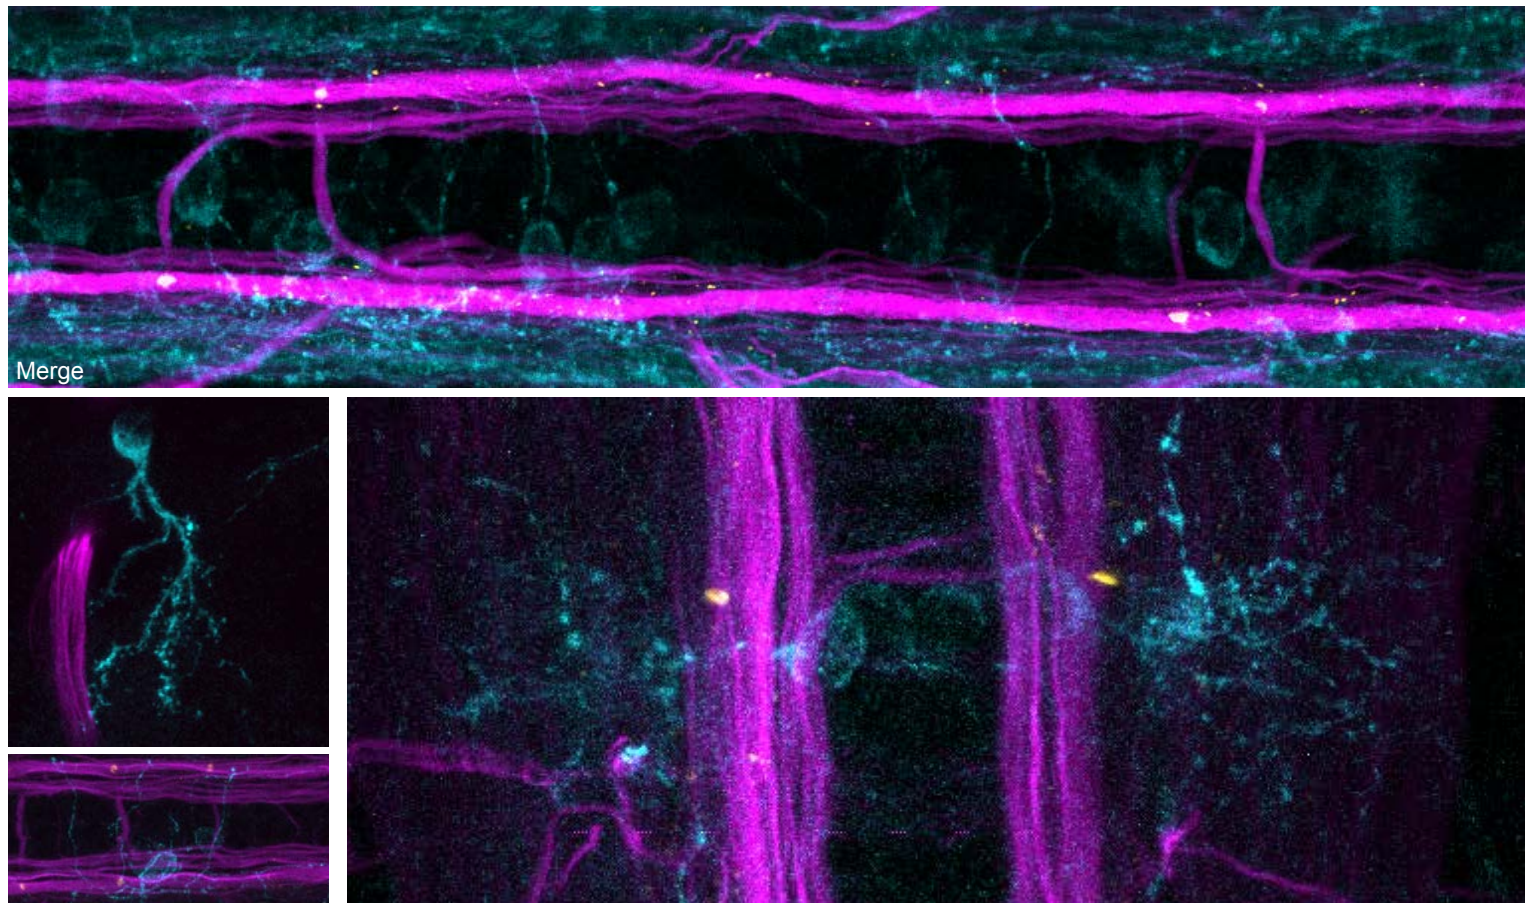

### Shank2b

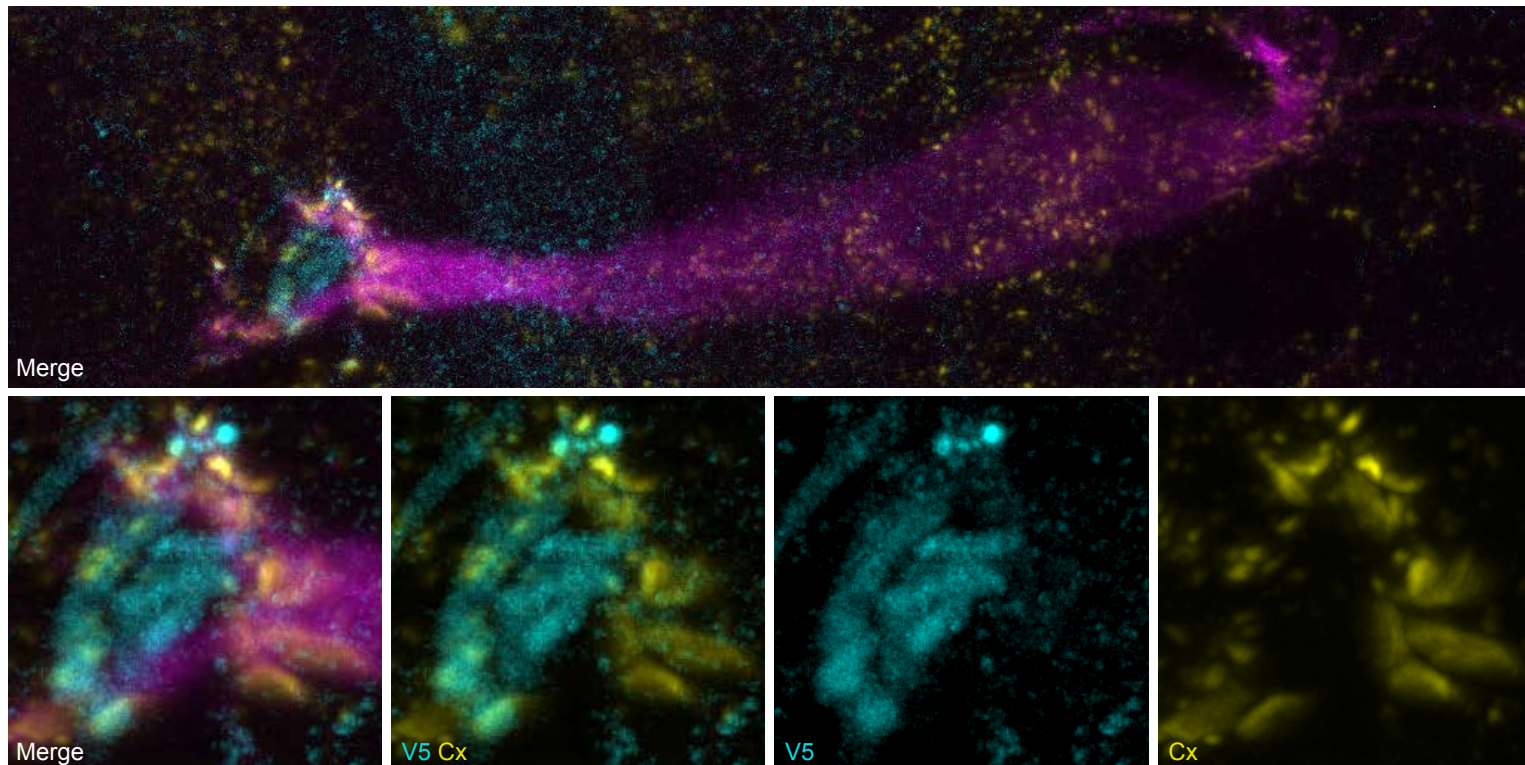



### Shank3a

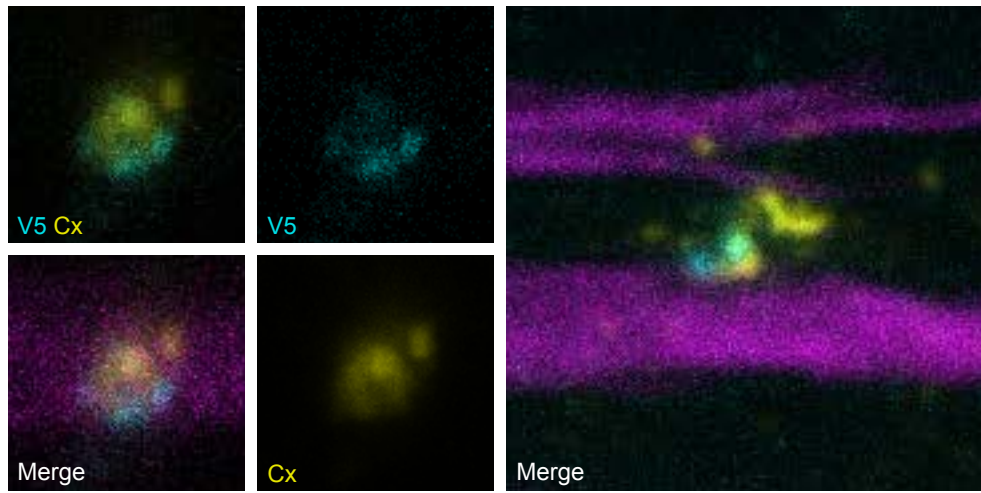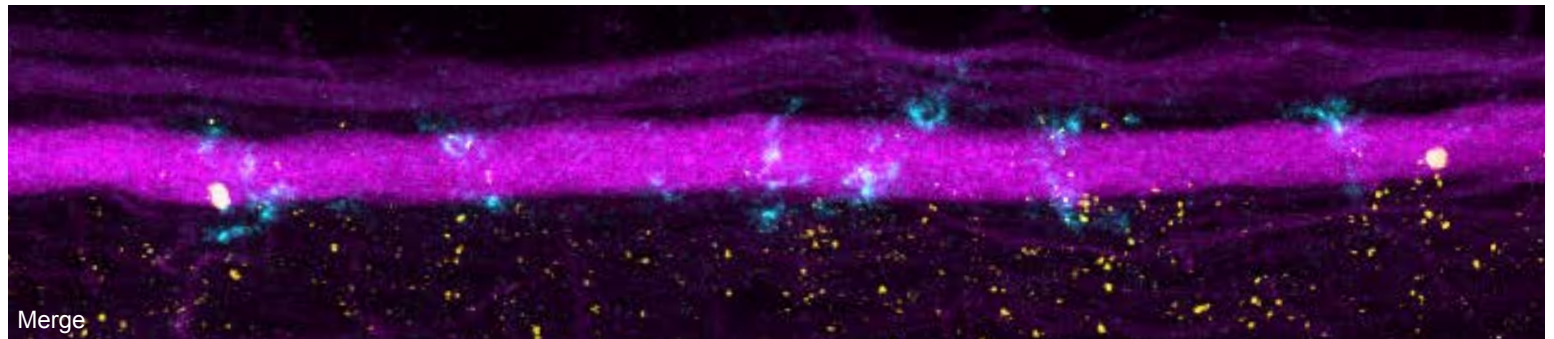

### Shank3b

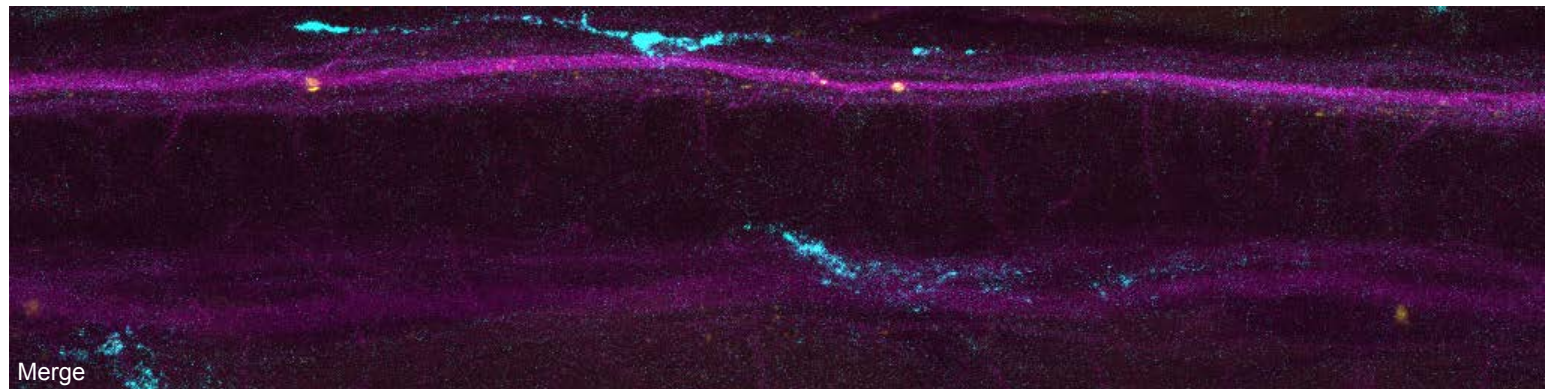

## Smap1

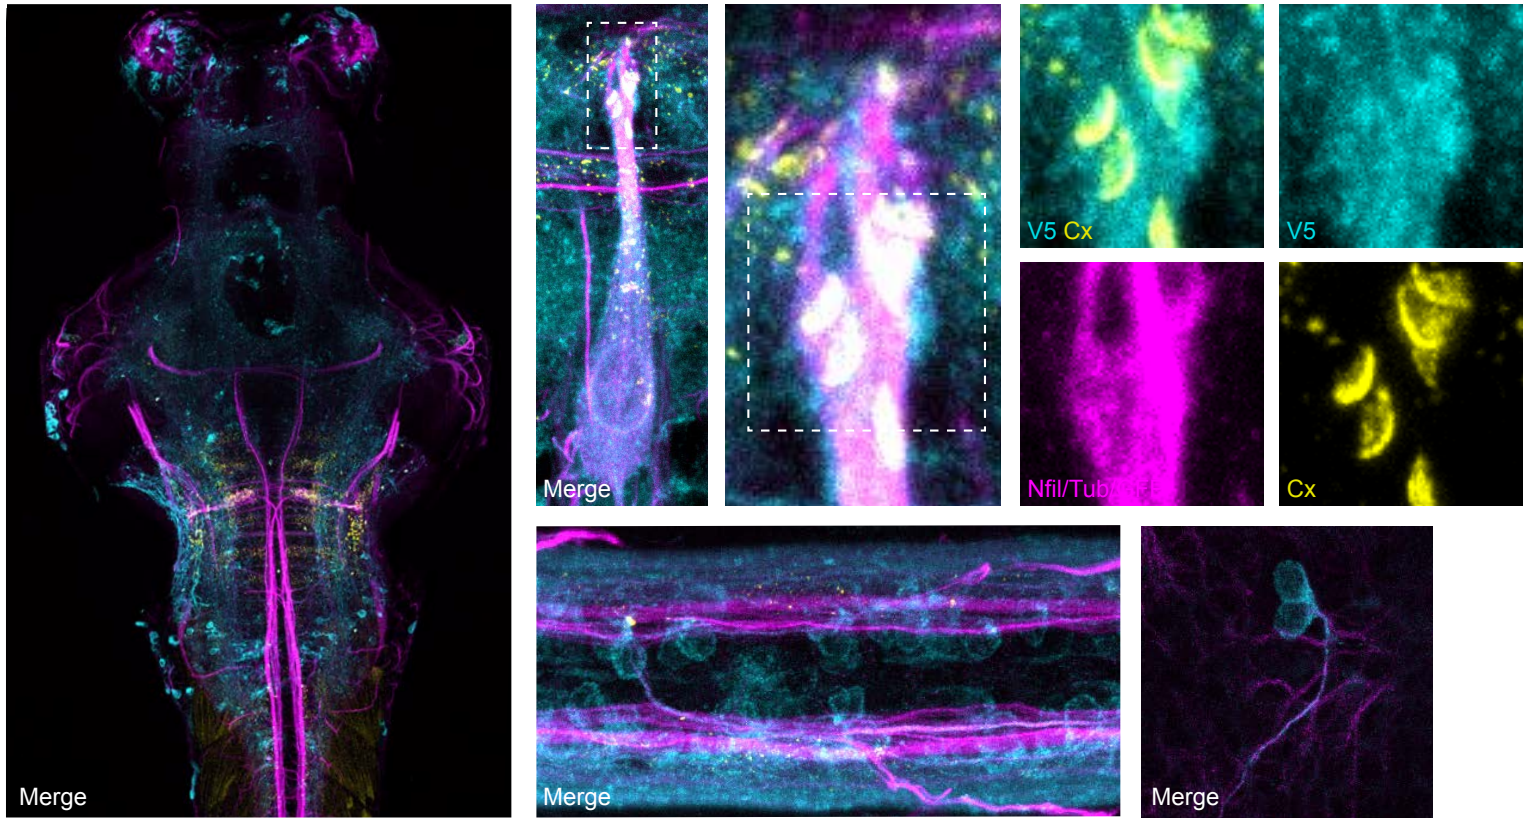

## Syngap1a

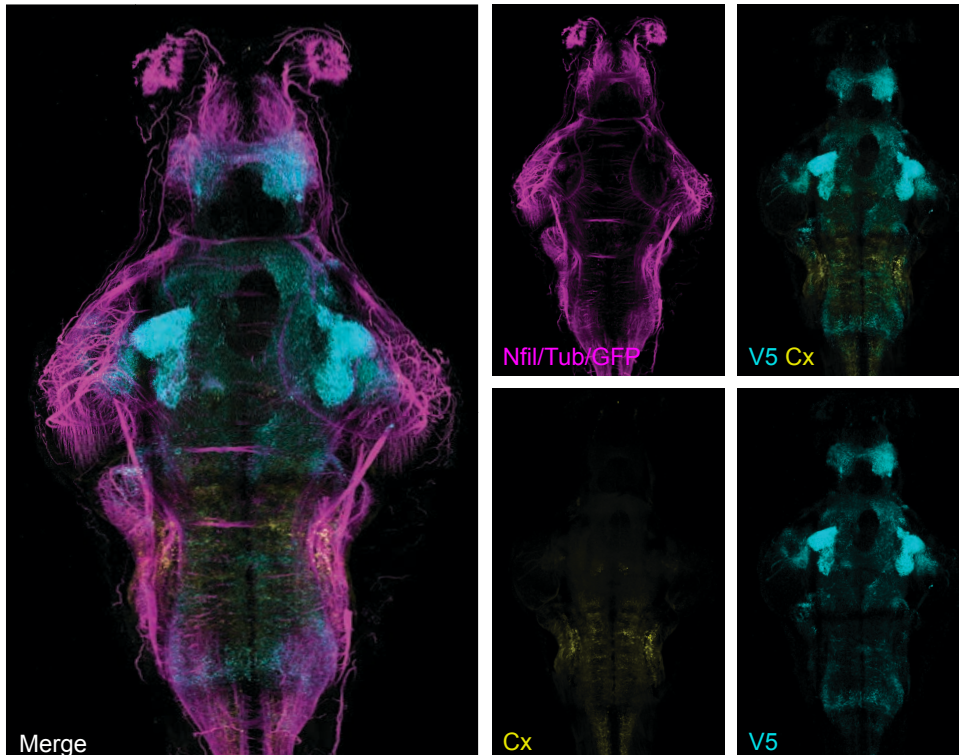



### Syngap1b

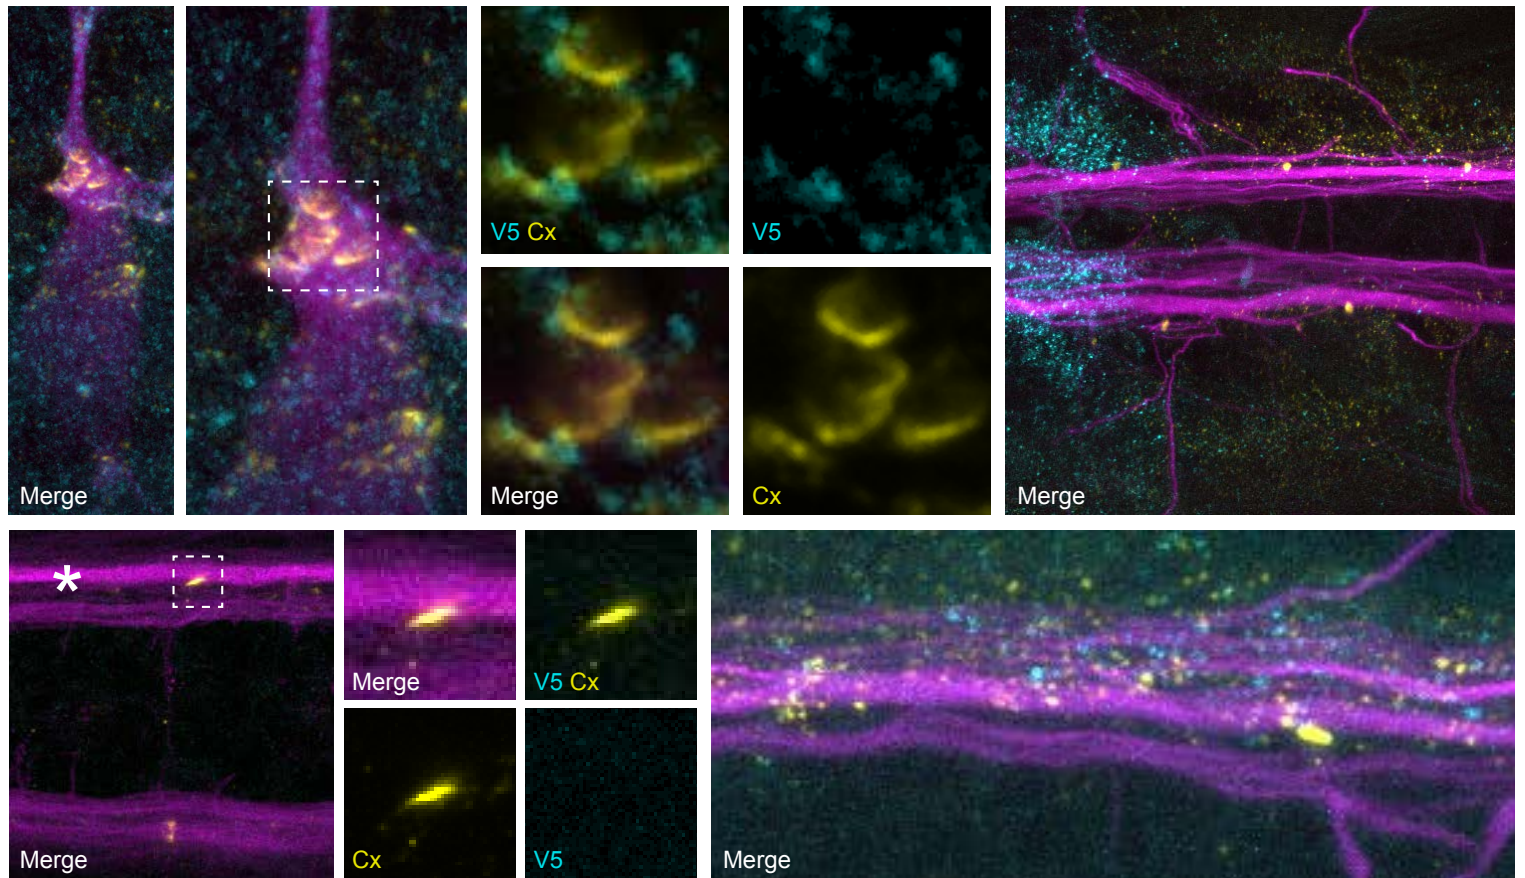

### Tjp1a/ZO1a

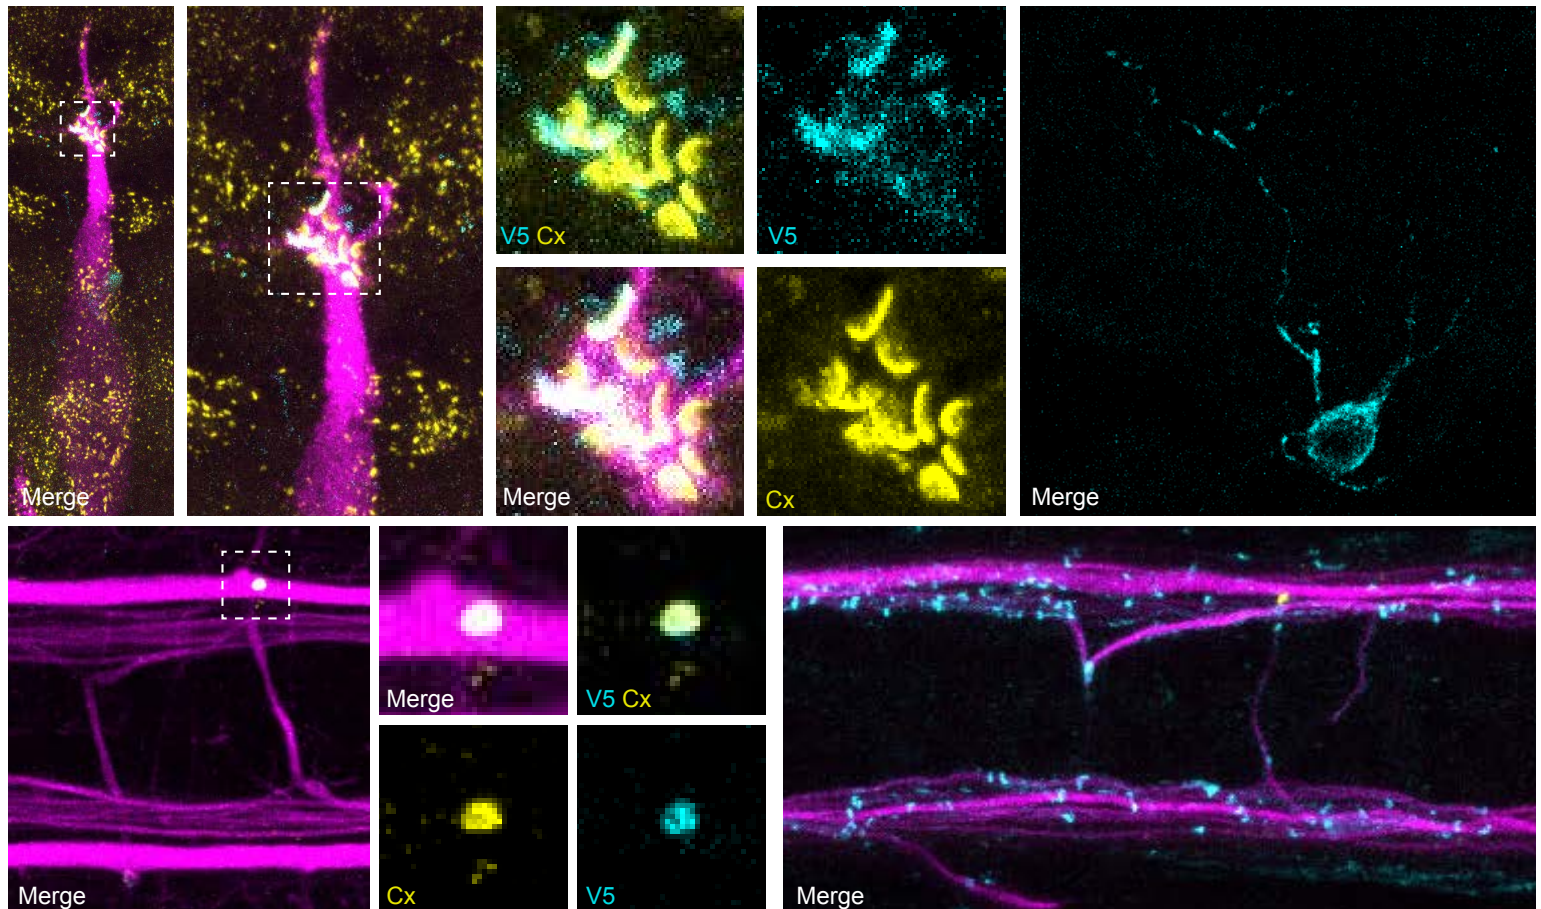



### Tjp2a/ZO2a

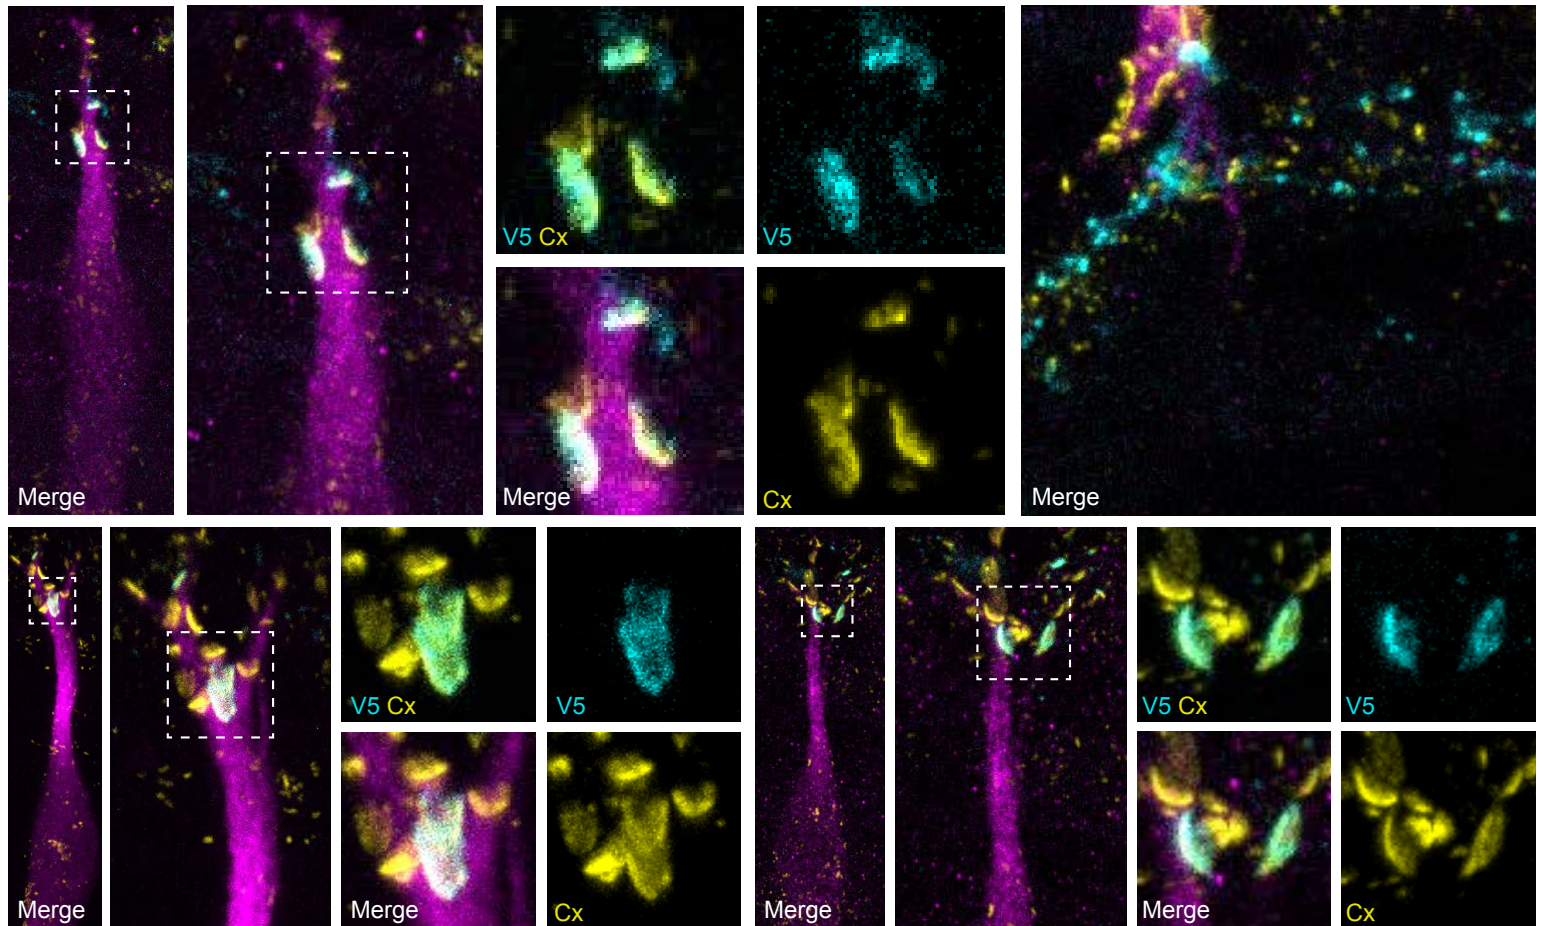

### tjp2b

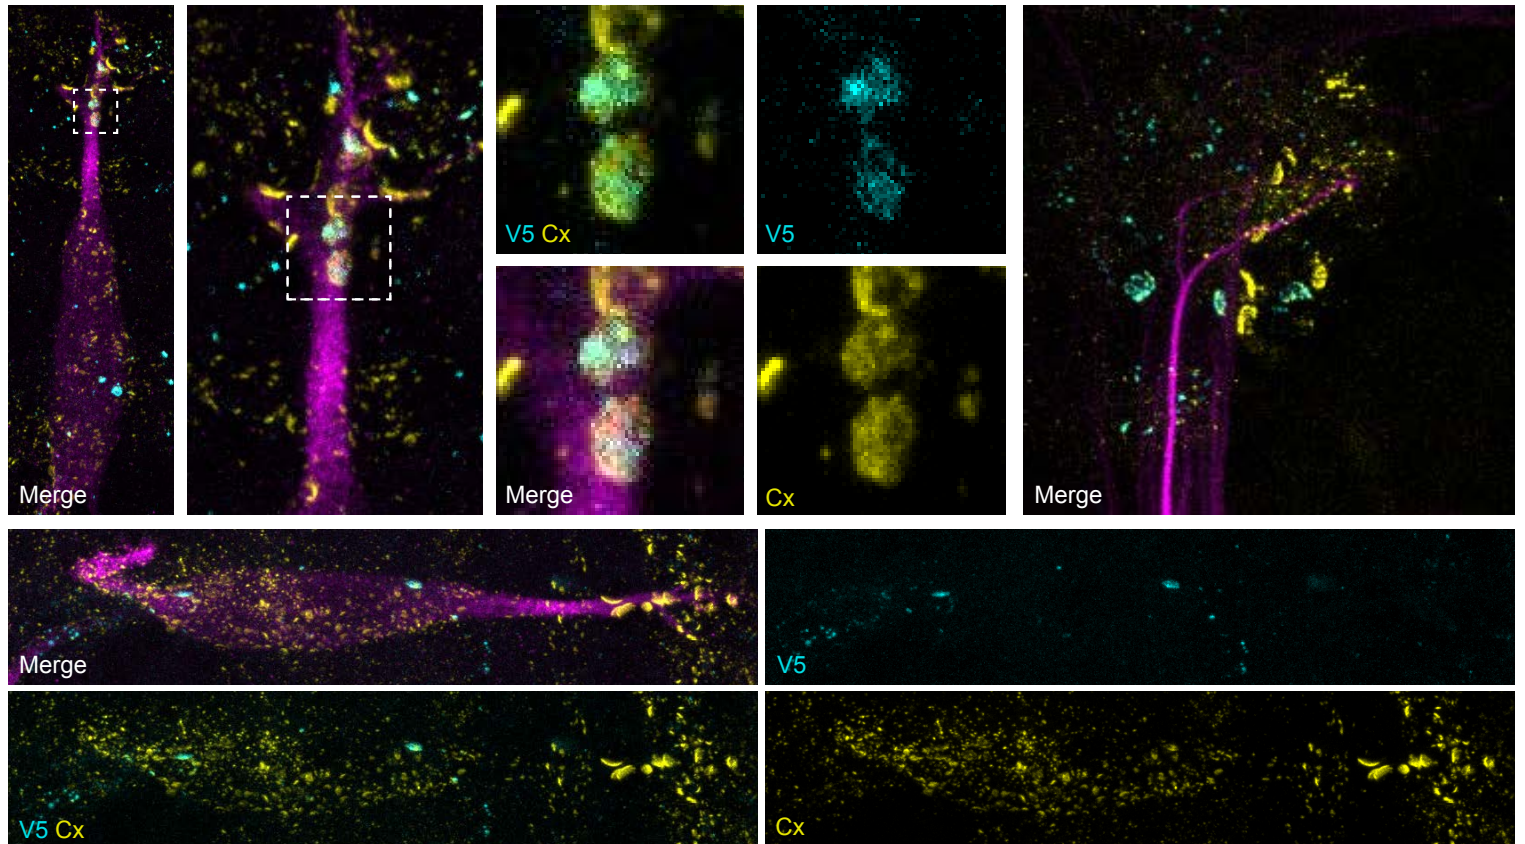



**Fig. S5 (cont.)**

bioRxiv preprint doi: <https://doi.org/10.1101/2024.11.22.624763>; this version posted November 22, 2024. The copyright holder for this preprint (which was not certified by peer review) is the author/funder, who has granted bioRxiv a license to display the preprint in perpetuity. It is made available under aCC-BY-NC 4.0 International license.

**Whrn**

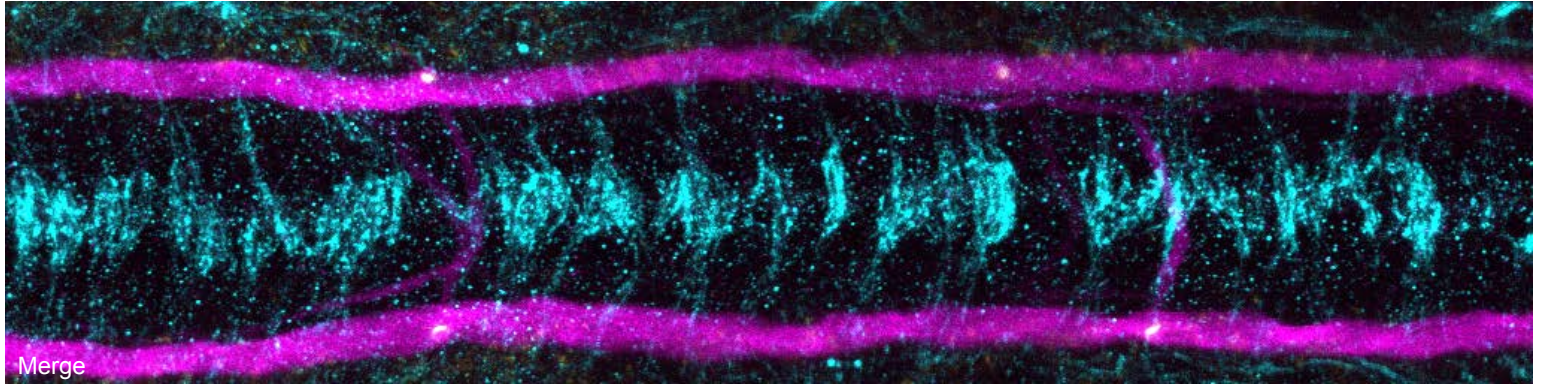

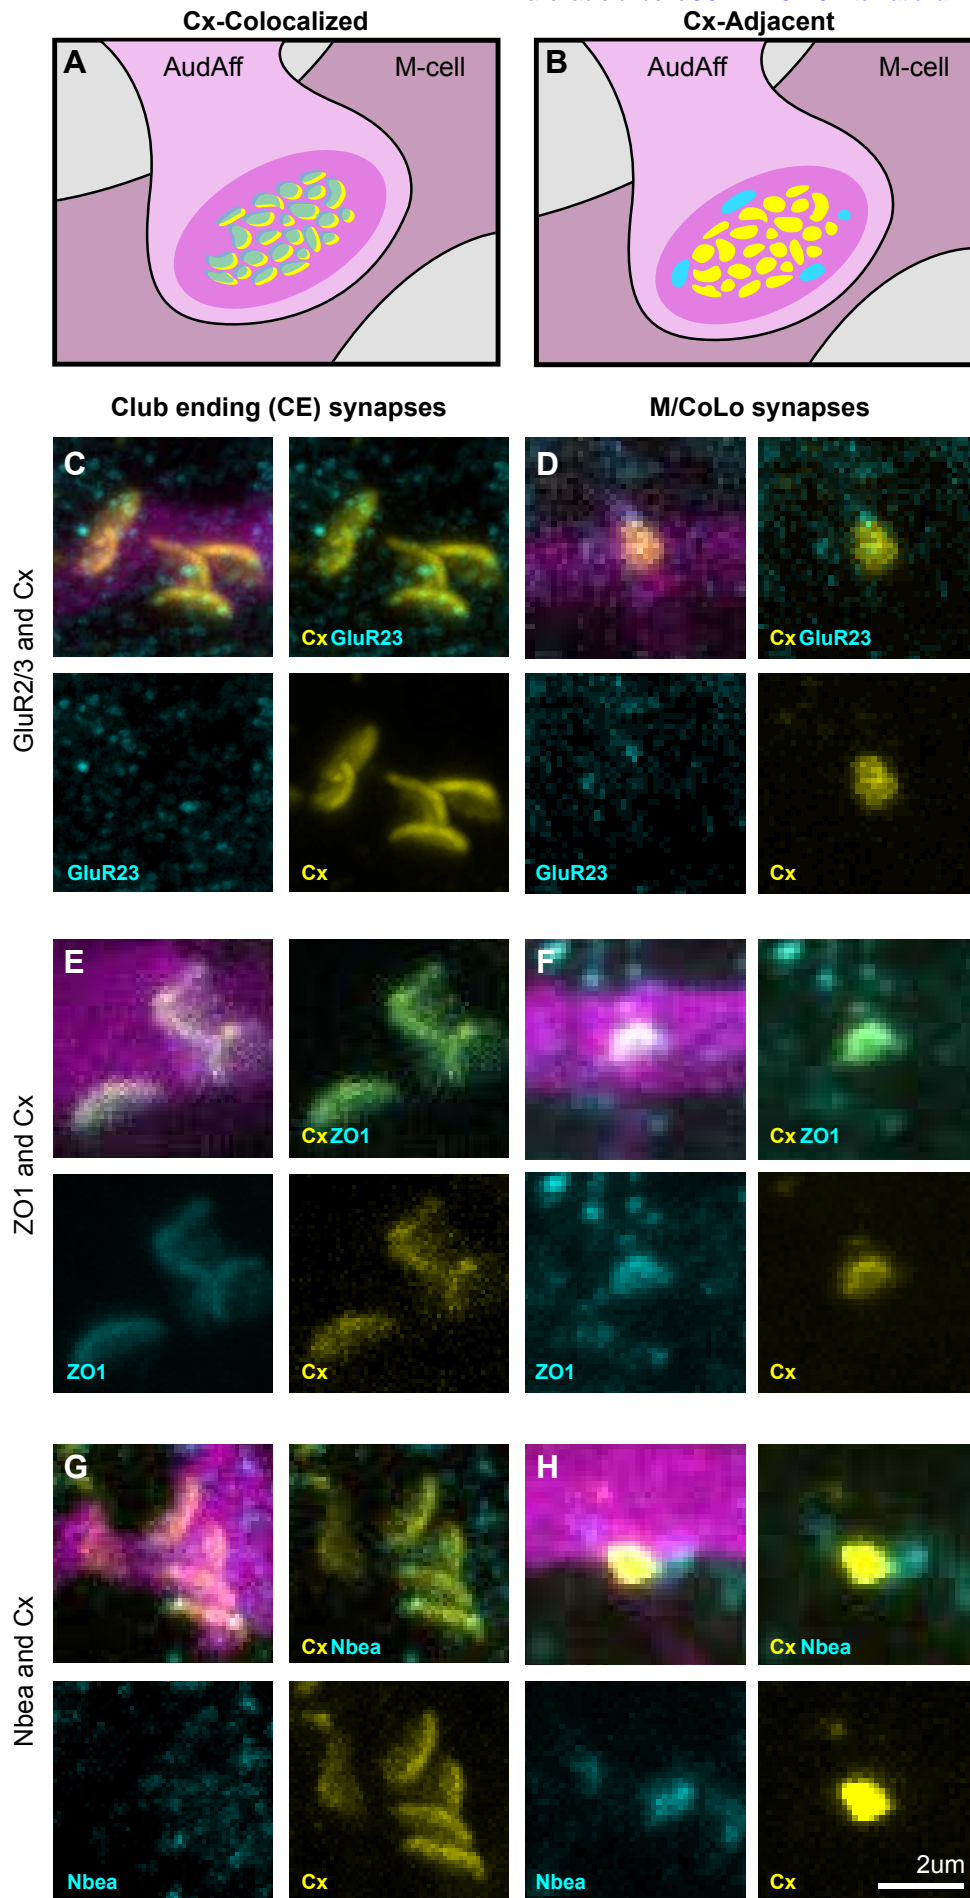

Supplement: NIHPP2024.11.22.624763V1-supplement-1.pdf [file NIHPP2024.11.22.624763V1-supplement-1.pdf]
